1 Viral proteins and virus-like particles of the LTR5\_Hs endogenous  
2 retrovirus in human primordial germ cell-like cells

3

4 Mutsumi Kobayashi<sup>1</sup>, Misato Kobayashi<sup>1</sup>, Johannes Kreuzer<sup>1</sup>, Eric Zaniwski<sup>1</sup>,  
5 Jae Jung Kim<sup>2</sup>, Keiko Shioda<sup>1</sup>, Hikari Hagihara<sup>1</sup>, Junko Odajima<sup>1</sup>, Ayako Nakashoji<sup>1</sup>,  
6 Yi Zheng<sup>3</sup>, Jianping Fu<sup>4,5,6</sup>, Maria Ericsson<sup>7</sup>, Kazuhiro Kawamura<sup>8</sup>, Shannon L. Stott<sup>1, 2</sup>,  
7 Daniel Irimia<sup>2</sup>, Wilhelm Haas<sup>1</sup>, Chin-Lee Wu<sup>1, 9</sup>, Maria Tokuyama<sup>10</sup>, and Toshi Shioda<sup>1\*</sup>

8

9 <sup>1</sup>Massachusetts General Hospital Center for Cancer Research & Harvard Medical School,  
10 Charlestown, MA 02129, USA

11 <sup>2</sup>BioMEMS Resource Center, Center for Engineering in Medicine and Surgery, Department of  
12 Surgery, Massachusetts General Hospital, Charlestown, MA 02129, USA

13 <sup>3</sup>Department of Biomedical and Chemical Engineering, Syracuse University, Syracuse, NY  
14 13244, USA

15 <sup>4</sup>Department of Mechanical Engineering, University of Michigan, Ann Arbor, MI 48109, USA

16 <sup>5</sup>Department of Cell and Developmental Biology, University of Michigan Medical School, Ann  
17 Arbor, MI 48109, USA

18 <sup>6</sup>Department of Biomedical Engineering, University of Michigan, Ann Arbor, MI 48109, USA

19 <sup>7</sup>Electron Microscopy Laboratory, Department of Cell Biology, Harvard Medical School, Boston,  
20 MA 02115, USA

21 <sup>8</sup>Department of Obstetrics and Gynecology, Juntendo University Faculty of Medicine, Tokyo  
22 113-8421, Japan

23 <sup>9</sup>Department of Pathology, Massachusetts General Hospital & Harvard Medical School, Boston,  
24 MA 02114, USA

25 <sup>10</sup>Department of Microbiology and Immunology, Life Sciences Institute, The University of British  
26 Columbia, Vancouver, BC, Canada

27

28 \* Corresponding Author: Toshi Shioda M.D., PhD.; Tel: +1 (617) 726-3425;

29 E-mail: [shioda@helix.mgh.harvard.edu](mailto:shioda@helix.mgh.harvard.edu)

30 Running Title: LTR5\_Hs activation in human PGCs

31 Key words: human endogenous retroviruses, primordial germ cells, primordial germ cell-  
32 like cells, HERV-H, HERV-K, seminomas

## 35 **SUMMARY STATEMENT**

36 The hominoid-specific endogenous retrovirus LTR5\_Hs is activated in a cell culture  
37 model resembling early-stage human primordial germ cells, producing not only viral  
38 RNA but also retrovirus proteins and virus-like particles.

39

40

## 41 **ABSTRACT**

42 The hominoid-specific endogenous retrovirus LTR5\_Hs is transcriptionally activated in  
43 human primordial germ cell-like cells (hPGCLCs), a pluripotent stem cell-derived cell  
44 culture model of PGCs. Here, taking the unique advantage of our novel cell culture  
45 method to obtain large amounts of pure hPGCLCs, we performed proteomics profiling of  
46 hPGCLCs and detected various viral proteins produced from the LTR5\_Hs RNA *via*  
47 ribosomal frameshifting. We also present transmission electron microscopy images of  
48 100-nm diameter virus-like particles (VLPs) assembled at the surface of hPGCLCs.  
49 Compared to hPGCLCs, expression of LTR5\_Hs RNA is far weaker in human  
50 seminomas, the germ cell tumors resembling PGCs. Re-analysis of published single cell  
51 RNA-seq data of human embryos revealed strong activation of LTR5\_Hs in migrating  
52 PGCs but suppressed in PGCs upon they reach the gonadal anlagen. In the  
53 microfluidics-supported polarized embryoids mimicking peri-implantation stages of  
54 human embryos, LTR5\_Hs RNA was detected by RNA in situ hybridization in  
55 NANOG<sup>+</sup>/TFAP2C<sup>+</sup>/SOX17<sup>+</sup> cells resembling freshly emerged PGCs. These results  
56 support that human germ cells produce LTR5\_Hs proteins and VLPs during their  
57 earliest stages of normal development until their settlement in the gonadal anlagen.

58

## 59 INTRODUCTION

60 Human endogenous retroviruses (HERVs) are remnants of ancient infection by retroviruses,  
61 comprising nearly 8% of the human genome (Deniz et al., 2018; Durnaoglu et al., 2021a; Geis  
62 and Goff, 2020; Groh and Schotta, 2017; Liu et al., 2014; Mao et al., 2021). Whereas most  
63 HERVs are permanently inactivated by accumulated mutations or strongly suppressed by  
64 epigenetic machineries, some of the activation-competent copies of HERVs may play critical  
65 roles in a wide variety of human diseases, including various malignancies, autoimmune diseases,  
66 and neurological disorders (Babaian and Mager, 2016; Doucet-O'Hare et al., 2021). Non-  
67 physiological reactivation of HERVs may be caused by malnutrition, exposure to environmental  
68 toxicants, or impaired health conditions (Sakurai et al., 2019; Sharif et al., 2013; Shioda et al.,  
69 2022). On the other hand, activation of several copies of HERVs is necessary for normal human  
70 development or body functions (Evsikov and Marin de Evsikova, 2016; Weiss, 2016). For  
71 example, production of the salivary alpha-amylase (ptyalin) is dependent on salivary gland-  
72 specific activation of a copy of HERV located in the promoter of the *AMY1C* gene (Ting et al.,  
73 1992). Formation of the syncytiotrophoblast through trophoblast cell fusion in placenta requires  
74 syntylin-1, a fusogenic protein derived from the envelope protein of a HERV (Durnaoglu et al.,  
75 2021b; Mi et al., 2000). Strong transcriptional activation of the HERV-H family is necessary for  
76 acquisition and maintenance of pluripotency by stem cells during early development of human  
77 embryos, possibly through affecting the chromatin contact dynamics (Ohnuki et al., 2014;  
78 Sexton et al., 2022; Zhang et al., 2019).

79         Members of the HERV-K clade represent the HERVs most recently integrated into the  
80 human genome, and many of them are still transcriptionally active (Garcia-Montojo et al., 2018;  
81 Xue et al., 2020a). HERV-K consists of ten or eleven HML (human mouse mammary tumor  
82 virus-like) subgroups, among which HML-2 is the youngest and most active (Subramanian et al.,  
83 2011). Although all copies of the HML-2 proviruses are defective in at least one gene, many of  
84 them have complete open reading frames encoding retroviral proteins detected in healthy and  
85 malignant human cells (Curty et al., 2020). HML-2 are capable of forming virus-like particles  
86 (VLPs), which has been detected in human naïve pluripotent stem cells as well as malignant cells  
87 (Bieda et al., 2001; Grow et al., 2015). Whereas the human genome contains approximately 1000  
88 copies of HML-2 solitary LTRs, which lack DNA sequences coding viral proteins, only less than  
89 100 copies of HML-2 proviruses have been identified so far (Xue et al., 2020b). The HML-2

90 family of HERVs consists of three subgroups – namely, LTR5\_Hs, LTR5A, and LTR5B.  
91 LTR5\_Hs is the youngest among all types of HERVs and has successfully expanded in the  
92 hominoid lineage (Garcia-Montojo et al., 2018; Holloway et al., 2019; Xue et al., 2020a).  
93 LTR5\_Hs is activated in early-stage pluripotent cells in human embryos and embryonal  
94 carcinoma tumor cells, in which their transcriptional actions significantly affect the epigenomic  
95 integrity of the human genome (Fuentes et al., 2018; Grow et al., 2015; Pontis et al., 2019;  
96 Zhang et al., 2022).

97 Human Primordial Germ Cells (hPGCs) emerge from amnion and epiblast of embryos as  
98 the earliest precursors of all germ cells 11-12 days after fertilization (Saitou, 2021). Despite the  
99 importance of studying hPGCs to promote reproductive health, access to hPGCs in human  
100 embryos is extremely challenging for both technical and ethical barriers. To overcome these  
101 hurdles, cell culture models resembling hPGCs have been generated from human pluripotent  
102 stem cells (hPSCs) (Saitou, 2021). These models, collectively known as human PGC-Like Cells  
103 (hPGCLCs), can be produced from various states of naïve pluripotent stem cells (Irie et al., 2015;  
104 Mitsunaga et al., 2017; von Meyenn et al., 2016) or cells resembling the early-stage mesodermal  
105 precursor cells (incipient Mesoderm-Like Cells: iMeLCs) (Chen et al., 2017; Sasaki et al., 2015).  
106 Our previous study showed that the transcriptomic profiles of hPGCLCs produced using various  
107 methods in different laboratories are largely homogenous, resembling the transcriptome of  
108 hPGCs before initiation of the chemotaxis towards gonadal anlagen (Mitsunaga et al., 2017).  
109 hPGCLCs are capable of differentiating to advanced stages of male and female germ cells *in*  
110 *vitro*, further demonstrating their faithful resemblance to hPGCs (Hwang et al., 2020; Yamashiro  
111 et al., 2018). Whereas *in vitro* expansion of hPGCLCs has been proven challenging (Gell et al.,  
112 2020; Murase et al., 2020), our recent study has overcome this technical barrier and established a  
113 serum-free, feeder layer-free cell culture condition that effectively supports long-term expansion  
114 of hPGCLCs (Kobayashi et al., 2022). Under this condition, Long-Term Culture hPGCLCs  
115 (LTC-hPGCLCs) strongly express telomerase and rapidly amplify without apparent passaging  
116 limit or signs of senescence while strictly maintaining their hPGC-like characteristics as a highly  
117 homogeneous cell population. LTC-hPGCLCs provide unprecedented opportunities to obtain  
118 large amounts of pure hPGCLC specimens, which are often required for several standard  
119 analytical approaches such as proteomics or transmission electron microscopy (TEM) (Graham  
120 and Orenstein, 2007).

121           Recent studies have shown that LTR5\_Hs are activated in hPGCLCs and provided  
122 evidence that this hominoid-specific group of the HERVs play significant roles in transcriptional  
123 regulation of genes involved in development of germ cells (Ito et al., 2022; Xiang et al., 2022).  
124 Our study has shown specific and robust CpG demethylation of LTR5\_Hs in both fresh and  
125 long-term cultured hPGCLCs compared to the precursor hiPSCs (Kobayashi et al., 2022). In  
126 freshly isolated hPGCLCs, less than 20% of CpG sites in LTR5\_Hs were methylated whereas  
127 other HERVs such as LTR7/HERV-H retained nearly 50% CpG methylation. Long-term  
128 expansion of hPGCLCs for 12 weeks further reduced CpG methylation in LTR5\_Hs down to  
129 ~10%. Thus, activation of LTR5\_Hs in hPGCLCs is specific – it is not a mere consequence of  
130 global DNA demethylation in this model of human germ cells.

131           Taking advantage of the LTC-hPGCLCs, our current study demonstrates that not only  
132 LTR5\_Hs viral RNA species but also various retroviral proteins produced by the ribosomal  
133 frameshifting are strongly expressed in this cell culture model resembling early-stage normal  
134 hPGCs. In contrast, expression of LTR5\_Hs RNA in human seminomas, which are derived from  
135 transformed PGCs and still expressing the PGC marker SOX17 (Muller et al., 2021), is proven  
136 weak. We also show TEM images capturing robust assembly of LTR5\_Hs VLPs at the plasma  
137 membrane of LTC-hPGCLCs. Using an *in vitro* model resembling the peri-implantation stages  
138 of human embryos formed under a condition of microfluidics-aided polarized exposure to bone  
139 morphogenetic protein 4 (BMP4), we present evidence that activation of LTR5\_Hs occurs as  
140 soon as hPGCs emerge from their precursors. Thus, our study provide evidence that the earliest  
141 stages of normal human germ cell development – from the germline specification to hPGC  
142 settlement in the gonadal anlagen – occurs in the presence of various retrovirus-like activities of  
143 LTR5\_Hs, involving not only their transcriptional actions but also production of various  
144 retroviral proteins. Our study also suggests that hPGCs may robustly produce VLPs and deposit  
145 the particles in the path of their migration.

146

147

## 148 **RESULTS**

149 **RNA expression from distinct groups of HERVs in human iPSCs (hiPSCs),**  
150 **hPGCLCs, non-germline human embryoid body cells (hEBCs), and human**  
151 **seminoma tumors.**

152 Recent studies revealed strong activation of the youngest HERV species LTR5\_Hs in hPGCLCs  
153 (Ito et al., 2022; Xiang et al., 2022) whereas an older HERV LTR7/HERV-H are robustly  
154 activated in their precursor hPSCs (Ohnuki et al., 2014; Sexton et al., 2022; Zhang et al., 2019).  
155 Using the ERVmap tool of quantitative determination of RNA expression from HERV loci  
156 (Tokuyama et al., 2018) and RNA-seq data we previously published (Mitsunaga et al., 2017), we  
157 examined HERV RNA expression in the CD38-positive hPGCLCs, their precursor hiPSCs  
158 (clones A4, A5, A6), and CD38-negative non-germline cells. To this analysis we also included  
159 total RNA specimens isolated from ten cases of human pure seminomas, which are transformed  
160 late-stage hPGCs (Oosterhuis and Looijenga, 2019).

161 Unsupervised hierarchical clustering successfully classified the specimens by cell/tissue  
162 types – namely, hiPSCs, hPGCLCs, hEBCs, and seminomas – based solely on expression of  
163 HERV RNA transcripts (Fig. 1A, *left* heatmap), reproducing our previous analysis using the  
164 whole transcriptomes of protein coding genes (Mitsunaga et al., 2017). Ten clusters of HERVs  
165 differentially expressed between distinct types (C1-C10) were identified (Fig. 1A, connecting *left*  
166 and *right* heatmaps, and Table S1). Clusters C3 and C6 consisted of two subclusters (C3a and  
167 C3b, C6a and C6b) located separately in the main (*left*) heatmap. Relative expression profile of  
168 HERVs representing each of these ten clusters across different cell/tissue types demonstrated  
169 striking type-specific expression of HERVs (Fig. 1B). Agreeing with previous studies, hiPSCs  
170 strongly expressed LTR7/HERV-H, and the majority of HERVs specifically expressed in hiPSCs  
171 (Cluster 2) were LTR7/HERV-H, which was also the dominant HERV species commonly  
172 expressed in both hiPSCs and seminomas (Cluster 1) or hiPSCs and hPGCLCs (Cluster 3) (Fig.  
173 S1, Table S1). In contrast, among 96 HERVs specifically expressed in hPGCLCs (Cluster 4),  
174 LTR5\_Hs was the most frequently found HERV species over LTR7/HERV-H. Among 32  
175 HERVs specifically expressed in seminomas (Cluster 10), we detected only one or three copies  
176 of LTR7/HERVH-int or LTR5\_Hs, respectively, whereas LTR17/LTR17-int was the most  
177 frequently activated HERV species. We identified only 9 HERVs commonly activated in both  
178 hPGCLCs and seminomas (Cluster 9), and none of them was LTR5 and only one was  
179 LTR5/HERV-H. These results showed that LTR7/HERV-H represented HERVs activated in  
180 hiPSCs. Upon differentiation of hiPSCs to hPGCLCs, LTR5\_Hs was activated while  
181 LTR7/HERV-H was suppressed. LTR5\_Hs activation was not significant in seminoma tissues.

182 We determined 50 copies of HERVs most strongly expressed in hPGCLCs, and we  
183 summarized their locations in the human genomic DNA and strength of viral RNA expression in  
184 Table S2. Among them, 40 copies (80%) belonged to Cluster 4 (specific to PGCLCs) whereas 7  
185 copies (14%) belonged to Cluster 9 (PGCLCs and seminomas). Among these 40 Cluster 4  
186 HERVs, 20 copies (50%) were LTR5, and all of them were LTR5\_Hs. In contrast, 2 copies of  
187 the Cluster 9 HERVs were LTR5, and one of them was LTR5\_Hs. Thus, HERVs strongly  
188 activated specifically in hPGCLCs were represented by LTR5\_Hs.

189

### 190 **Evaluation of computational tools for quantitative determination of HERV viral** 191 **RNA expression from RNA-seq data.**

192 ERVmap is a software tool developed for quantitative analysis of RNA-seq data for expression  
193 of viral RNA transcripts from HERVs (Tokuyama et al., 2018). Several other computational  
194 tools for similar purposes have been described, but accuracy of these tool is a debatable subject  
195 (Iniguez et al., 2019; Tokuyama et al., 2019). To establish a reliable computational pipeline for  
196 HERV RNA expression, we compared representative tools – namely, ERVmap (Tokuyama et al.,  
197 2018), Telescope (Bendall et al., 2019), and Salmon-TE (Jeong et al., 2018).

198 The original ERVmap consist of a series of Perl script and requires several components  
199 that are no longer available from open sources. We re-implemented ERVmap using the scripting  
200 language Ruby and open-source codes to create ERVmap2. Whereas ERVmap assigns RNA-seq  
201 reads to 3,220 hand-picked HERV proviruses in the GRCh38/hg38 human reference genome, we  
202 generated an independent list of relatively well-integrated 2,504 HERV proviruses consisting of  
203 one 5' LTR, one 3' LTR, and at least one internal sequence connected via gaps not greater than 1  
204 kb (Fig. S1A). Numbers of HERVs belonging to each clade and the whole list of the selected  
205 HERVs (which is referred to as the ERVmap2 HERV provirus list in this study) are provided as  
206 Tables S3 and S4, respectively. The majority of the selected, well-organized HERV proviruses  
207 are HERV-H (37%), HERV-L (20%), or HERV9 (10%); only 55 copies (2.2%) of HML2  
208 proviruses, including LTR5\_Hs, were included in this list (Fig. S1B).

209 From the ERVmap2 list (BED format) or its GTF-format version required for Telescope,  
210 we generated DNA sequences of well-organized HERV proviruses in the FASTA format (Fig.  
211 S2A). Using the ART simulator of Illumina sequencing data (Huang et al., 2012) and these  
212 FASTA provirus sequences, we generated “gold standard” SAM alignment data and FASTQ

213 simulated reads. The simulated FASTQ reads were then supplied to ERVmap, ERVmap2,  
214 Telescope, or Salmon-TE to estimate normalized expression of HERV RNA transcripts. On the  
215 other hand, HERV RNA expression levels were calculated directly from the gold standard SAM  
216 data and compared with the outcomes of the above tools by X-Y hexagon plots, in which a  
217 greater correlation coefficient reflects a greater degree of accuracy (Figs. S2B-S2E). Among  
218 these tools, ERVmap2 showed the greatest level of accuracy ( $R^2 = 0.8687$ ; Fig. S2C) followed by  
219 Salmon-TE ( $R^2 = 0.7655$ ; Fig. S2E) and ERVmap ( $R^2 = 0.5707$ ; Fig. S2B). Note that the same  
220 number of datum points were plotted in each panel although highly overlapped points reduce  
221 numbers of visible points. Whereas ERVmap2 and Salmon-TE over- and under-estimate HERV  
222 RNA expression relatively evenly, ERVmap tended to be biased toward under-estimation. On the  
223 other hand, the correlation coefficient of Telescope ( $R^2 = 0.002488$ ; Fig. S2D) was significantly  
224 lower than those of other tools with strong over- and under-estimation of HERV RNA  
225 expression. When the hierarchical clustering analysis shown in Fig. 1A was performed using  
226 Telescope, RNA specimens were classified by their types with significantly reduced accuracy,  
227 and identification of type-specific HERV clusters was practically challenging (Fig. S3). These  
228 results support that ERVmap2 is an adequate tool for quantitative evaluation of RNA transcripts  
229 from HERV proviruses.

230

### 231 **HERVH-to-HML2 class switching in HERV RNA expression during hiPSC** 232 **differentiation to hPGCLC.**

233 Taking advantage of the accurate detection of HERV RNA from RNA-seq data implemented by  
234 ERVmap2, we determined relative amounts of viral RNA transcripts expressed from the 18  
235 clades of HERVs defined in Table S3. RNA of LTR7/HERV-H was very strongly expressed in  
236 hiPSCs but significantly suppressed in hPGCLCs (Fig. 2A). In contrast, HML2 RNA was  
237 strongly expressed in hPGCLCs whereas it was nearly undetectable in primed hiPSCs.  
238 Expression of viral RNA from other 16 clades was far weaker than the above two clades in  
239 hiPSCs or hPGCLCs.

240 Real-time qPCR quantitation has successfully verified the ERVmap2 quantitation of  
241 LTR7/HERV-H and HML2 viral RNA transcripts (Fig. 2A *inset*). Expression of LTR7/HERV-H  
242 RNA was already diminished in the naïve hiPSCs comprising the freshly formed embryoid  
243 bodies (EB Day 0) compared to the primed hiPSCs. On the other hand, expression of HML2 was



244 very weak in the primed hiPSCs but already augmented in the naïve hiPSCs (EB Day 0). After 7  
245 days of incubation of the embryoid bodies, HML2 RNA was strongly expressed in the CD38<sup>+</sup>  
246 hPGCLCs but suppressed in the CD38<sup>-</sup> non-germline cells to a nearly undetectable level. Thus,  
247 the classes of strongly activated HERVs are switched from LTR7/HERV-H to HML2 during the  
248 conversion of primed hiPSCs to hPGCLCs. Typical RNA-seq tracks demonstrating this class  
249 switching are shown in Fig. 2B.

250 We next examined the relative strength of RNA expression between HERVs  
251 differentially or equally expressed in hiPSCs and hPGCLCs (Fig. 2C). Amounts of RNA  
252 expressed from differentially expressed copies of LTR7/HERV-H (*pale blue dots*) are largely  
253 comparable to those of equally expressed copies (*dark blue dots*). In contrast, HML2 expression  
254 from differentially expressed copies (*red dots*) were stronger than those of equally expressed  
255 copies (*yellow dots*). The apparent absence of HML2 copies strongly expressed in both hiPSC  
256 and hPGCLCs suggests that HML2 is actively suppressed in hiPSCs.

257 In our ERVmap2 analysis of well-organized HERVs, each copy of HML2 has 5'- and 3'-  
258 end LTRs belonging to three subclasses of LTR5 – namely, LTR5\_Hs, LTR5\_A, and LTR5\_B.  
259 Some of the HML2 copies have two LTR5\_Hs at both end whereas other copies may contain one  
260 or two non-Hs LTR5. The majority of the HML2 copies strongly expressed in hPGCLCs  
261 exclusively possessed LTR5\_Hs (Fig. 2D, LTR5\_Hs) whereas most HML copies harboring one  
262 or two non-Hs LTR5 (LTR5 Half or LTR5 non-Hs, respectively) were expressed in both hiPSC  
263 and hPGCLCs but very weakly.

264

### 265 **Expression of HML2 HERV RNA in early-stage PGCs *in vivo*.**

266 Since hPGCLCs resembles early-stage, DAZL-negative hPGCs in human embryos at 8-weeks of  
267 gestation or earlier (Hwang et al., 2020; Kobayashi et al., 2022; Mitsunaga et al., 2017), we  
268 attempted to detect HML2 viral RNA in previously published single-cell RNAseq data of human  
269 male and female germ cells at 4-26 weeks of gestation (Li et al., 2017). tSNE plots clearly  
270 separated NANOG<sup>+</sup> sexually bipotential germ cells from sexually committed germ cells,  
271 including SIX1<sup>+</sup> male cells and cells expressing female germline markers STRA8, SYCP1, and  
272 ZP3 (Figs. 3A and 3B). Cells strongly expressing HML2 were DAZL<sup>-</sup>, 4-5 weeks germ cells in  
273 both male and female embryos. Modest expression of HML2 was also observed with  
274 NANOG<sup>+</sup>/DAZL<sup>+</sup> immature germ cells. On the other hand, HERV-H RNA was weakly

275 expressed in all stages of germ cells. Expression of HML2 was stronger in mitotic germ cells of  
276 both male and female embryos whereas HERV-H was expressed equally in all stages of germ  
277 cells except for strong expression in female post-meiotic cells (Fig. 3C). These data indicate that  
278 HML2 is strongly activated in early-stage PGCs in 4-5 weeks embryos and thereafter suppressed  
279 upon sexual differentiation of germ cells.

280

### 281 **Activation of HML2 immediately after hiPSC differentiation to hPGCLCs.**

282 hPGCs emerge from amnion and epiblast of embryos 11-12 days after fertilization (Saitou,  
283 2021). In human embryos at 4-weeks of gestation, migrating hPGCs already express large  
284 amounts of HML2 viral RNA (Fig. 3). To estimate the timing of HML2 activation during the  
285 very early stages of human germ cell development, we took advantage of the microfluidics-  
286 supported, hPSC-derived human embryoid model that recapitulates critical landmarks of pre-  
287 gastrulation development under polarized exposure to BMP4 (Zheng et al., 2019). In this model,  
288 aggregates of hPSCs are formed in slits connecting two microfluidics channels, one of which is  
289 filled with gel (Gel channel) for physical support of the aggregates and the other (Cell-loading  
290 channel) is used for polarized supply of BMP4 as well as loading cells to the slits (Fig. 4A). In  
291 the absence or presence of polarized BMP4, the aggregates grew to epiblast-like cysts (ELCs) or  
292 posteriorized embryonic-like sac (P-ELS), respectively (Fig. 4B). In both ELCs and P-ELSs,  
293 NANOG was expressed in the epithelial parts of the embryoids (Fig. 4C). PGC-like cells  
294 emerged as NANOG/TFAP2C/SOX17 triple-positive cells in P-ELSs but not in ELCs (Fig. 4C),  
295 reproducing the original study of this model (Zheng et al., 2019). RNA *in situ* hybridization  
296 (RNA-ISH) of P-ELSs detected HML2 viral RNA exclusively in the PGC-like cells expressing  
297 nuclear SOX17 protein, and all these SOX17-expressing cells are HML2 viral RNA-positive  
298 (Fig. 4D). In contrast, no HML2 RNA-ISH signal was detected in ELCs (data not shown).  
299 Simultaneous RNA-ISH detection of NANOG and HML2 RNA revealed that HML2-positive  
300 NANOG-positive are mostly overlapped (Fig. 4E). These results provide *in vitro* evidence that  
301 HML2 is specifically activated in hPGCs immediately after they emerge in amnion/epiblast of  
302 pre-gastrulation human embryos.

303

### 304 **Production of HML-2 viral proteins and VLPs in LTC-hPGCLCs.**

305 Taking advantage of the LTC-hPGCLC cell culture technique that readily yields millions of  
306 hPGCLCs (Kobayashi et al., 2022), we attempted to detect viral proteins produced by HML2.  
307 Western blotting of total cell lysates with an antibody raised to the HML-2/HERV-K group-  
308 specific antigen (GAG) protein detected a **74-kDa band**, which corresponds to the GAG  
309 precursor protein (Lee and Bieniasz, 2007), in LTC-hPGCLCs but not in hiPSCs (Fig. 5A). We  
310 also detected a protein band of the same size from cell culture supernatant of LTC-hPGCLCs but  
311 not hiPSCs.

312 To obtain further evidence of protein expression from HML2, cell pellets of LTC-  
313 hPGCLCs and hiPSCs were subjected to quantitative proteomics analysis (Figs. 5B, 5C). SOX2  
314 protein, a pluripotent stem cell marker, was more strongly expressed in hiPSCs than LTC-  
315 hPGCLCs whereas expression of PGCLC marker proteins SOX15 and CD38 was stronger in  
316 LTC-hPGCLCs than hiPSCs, agreeing with the mRNA expression profile reported in our  
317 preceding study (Kobayashi et al., 2022). We observed strong expression of HML2 proteins  
318 corresponding to the predicted peptides of ERVK9 and ERVK21. In LTC-hPGCLCs, multiple  
319 peptides corresponding to parts of the predicted HML2-GAG and envelope (ENV) proteins are  
320 detected. We also detected a peptide corresponding to the HML2 viral proteinase (PRO), whose  
321 translation is dependent on ribosomal frame shifts of the same RNA transcript encoding the  
322 GAG protein (Garcia-Montojo et al., 2018).

323 As we observed expression of HML2 proteins in LTC-hPGCLCs, we attempted to  
324 determine whether HML2 is also capable of producing VLPs. Strikingly, transmission electron  
325 microscopy readily detected VLPs on the surface of LTC-hPGCLCs (Fig. 5D) but not hiPSCs  
326 (data not shown). The VLPs were approximately 100 nm in diameter with clearly visible  
327 condensed cores and lipid bilayer surface membrane but no prominent spikes. We observed  
328 VLPs already released from the cell surface (Fig. 5D, *left* panels) as well as VLPs being formed  
329 (*center*) or still adhered (*right*) to the plasma membrane. Immunoelectron microscopy  
330 demonstrated strong labeling of the VLPs with an anti-GAG antibody conjugated with 10 nm  
331 colloidal gold particles (Fig. 5E). Taken together, our data indicate that HML2 produces not only  
332 RNA transcripts but also viral proteins and VLPs in (LTC-)hPGCLCs, suggesting that early-  
333 stage hPGCs permit retrovirus-like activities of HML2 during their normal development.

334

335

## 336 **DISCUSSION**

337 Our current study has confirmed recent reports on expression of LTR5\_Hs viral RNA in  
338 hPGCLCs (Ito et al., 2022; Xiang et al., 2022). The class switching in the dominantly active  
339 HERV species from LTR7/HERV-H to HML2 during hiPSC conversion to hPGCLC (Figs. 1,  
340 2A, 2B, S1) agrees with our previous observation that CpG sites in LTR5\_Hs were robustly  
341 demethylated along with this conversion whereas LTR7/HERV-H was demethylated only  
342 modestly (Kobayashi et al., 2022). The HML2 copies activated in hPGCLCs were characterized  
343 with LTR5\_Hs flanking the protein-coding sequence whereas other HML2 copies harboring at  
344 least one non-Hs, older LTR5 were not activated (Fig. 2D), suggesting that relatively young  
345 copies of the hominoid-specific HML2 may be selectively activated in hPGCLCs. Whereas the  
346 preceding studies on LTR5\_Hs activation in hPGCLCs focused on genomic effects of LTR5\_Hs  
347 activation, our current study revealed that LTR5\_Hs also perform retrovirus-like virological  
348 actions, including production of viral proteins or VLPs, reminiscent of the VLP production by  
349 human epiblast cells (Grow et al., 2015). It is tempting to speculate that expression of LTR5\_Hs  
350 proteins may affect the innate immune system in human germline cells (Canadas et al., 2018;  
351 Chuong et al., 2016; Grandi and Tramontano, 2018; Zhao et al., 2014), which needs to be  
352 examined in future studies.

353 Some of the non-seminomatous human germ cell tumor cell lines derived from  
354 embryonal carcinomas/teratocarcinomas are known to produce HML2 VLPs as well as viral  
355 proteins (Bieda et al., 2001), which is reminiscent of HML2 activation in human naïve  
356 pluripotent stem cells (Grow et al., 2015). In contrast, our current study revealed that HML2 was  
357 not the HERV species predominantly activated in seminomatous human germ cell tumors, in  
358 which other HERV species such as THE1B or LTR17 were strongly activated (Figs. 1 and S1).  
359 Embryonal carcinomas express the pluripotency marker SOX2 but not the hPGC/hPGCLC  
360 marker SOX17 whereas both human seminomas and hPGCLCs are SOX2-negative and SOX17-  
361 positive (Kobayashi et al., 2022; Muller et al., 2021). It has been proposed that SOX2 and  
362 SOX17 determine the fate of germ cell tumors to either embryonic stem cell-like (embryonal  
363 carcinoma) or hPGC-like (seminoma) (Muller et al., 2021). The unique profiles of HERV  
364 activation between embryonal carcinomas and seminomas may contribute to the distinct  
365 biological characteristics of these two types of tumors derived from hPGCs.

366 In summary, our current study has revealed that young copies of the hominoid-specific  
367 LTR5\_Hs HERVs produce not only RNA but also viral proteins and VLPs in human PGCLCs.  
368 We also provide evidence that LTR5\_Hs are activated in early-stage hPGCs *in vivo* immediately  
369 after these first germline precursor cells emerge from the amnion/epiblast in the pre-gastrulation  
370 stage of human embryos. Future research on biological significance of the LTR5\_Hs activation  
371 in human germ cells should study not only the genomic impact of LTR5\_Hs sequences as  
372 transcriptional enhancers/activators but also potential roles of the LTR5\_Hs viral proteins and  
373 VLPs in the innate and/or adaptive immunity as well as germline cell development.

374

375

## 376 **MATERIALS AND METHODS**

### 377 **Human cell cultures and tissues**

378 All human iPSCs (A4, A5, A6) used in the present research and their differentiation to hPGCLCs  
379 through microwell-supported formation of embryoid bodies were described in our previous  
380 studies (Kobayashi et al., 2022; Mitsunaga et al., 2017; Mitsunaga et al., 2021). Human  
381 seminoma tumor tissues were surgically excised from patients at the Massachusetts General  
382 Hospital (MGH) and pathologically diagnosed as pure seminomas by the MGH Genitourinary  
383 Pathology Services. Frozen tissues of the tumors were then made available for the current  
384 research through the MGH Genitourinary Tumor Bank (IRB approval number ???)

385

### 386 **RNA-seq**

387 The fastq deep sequencing raw data of human iPSCs, CD38<sup>+</sup> hPGCLCs, and CD38<sup>-</sup> EBCs were  
388 described in our previous study (Mitsunaga et al., 2017). Total RNA extraction, library  
389 construction, and deep sequencing of human seminoma tissues were performed similarly to  
390 obtain 34-52 million, uniquely mapped paired-end reads (75 + 75).

391

### 392 **Quantitation of RNA expression from HERV loci**

393 RNA-seq estimation of RNA expression from HERV loci was performed using the ERVmap  
394 Perl scripts as we previously described (Tokuyama et al., 2018). While the ERVmap tool is  
395 accessible as a web-based service (<https://www.ervmap.com>), we also developed a novel tool

396 implementing the original ERVmap pipeline by Ruby scripts using updated and publicly  
397 available software tools. In the current study, this Ruby-based tool is mentioned as ERVmap2.

398 The FASTQ raw sequence reads were subjected to quality control analysis using the  
399 fastQC tool (Babraham Institute), and adaptor sequences, low-quality reads (Phred score < 25),  
400 and short reads (< 40 bp) were removed using the Trim Galore! tool (Babraham). The filtered  
401 FASTQ reads were either subjected to ERVmap analysis of HERV RNA expression or examined  
402 using ERVmap2 as follows. The FASTQ reads were aligned to the GRCh38/hg38 human  
403 genome reference sequence using the STAR aligner to generate BAM alignment files. Uniquely  
404 mapped reads were extracted from the BAM files using sambamba (Tarasov et al., 2015) and  
405 subjected to counting their overlaps with a BED file of HERV coordinates using bedtools  
406 (Quinlan and Hall, 2010).

407 Whereas the original ERVmap uses a BED file containing coordinates of 3,220 HERV  
408 proviruses, ERVmap2 uses an updated BED file containing 2,504 HERV coordinates generated  
409 using stricter criteria of proviruses. Thus, LTRs and internal HERV sequences identified in the  
410 GRCh38/hg38 human reference genome by RepeatMasker (Tarailo-Graovac and Chen, 2009)  
411 were filtered for the clade, LTR species, and internal sequence types described in Table S3. Then  
412 HERVs consisting of one 5' LTR, one 3' LTR, and at least one internal sequence connected via  
413 gaps not greater than 1 kb. Numbers of HERVs belonging to each clade and the whole list of the  
414 selected HERVs are provided as Tables S3 and S4, respectively. [Table S4?](#)

415 For evaluation of HERV RNA quantitation tools, ERVmap2 BED files of the HERV  
416 provirus list was used, and for Telescope this BED file was converted to the GTF format.  
417 FASTA sequences of the HERV proviruses were generated using bedtools. FASTQ reads  
418 simulating Illumina sequencing and the “gold standard” SAM alignment data were generated  
419 using the ART simulator (Huang et al., 2012), and the FASTQ data were subjected to analyses  
420 using HERV RNA quantitation tools ERVmap (Tokuyama et al., 2018), ERVmap2, Telescope  
421 (Bendall et al., 2019), and Salmon-TE (Jeong et al., 2018). Outcomes of the tools were compared  
422 with ERV counts generated from the gold standard SAM alignment data using bedtools. All read  
423 counts were normalized using the negative binominal trimmed mean of M-values method  
424 implemented by the Bioconductor package edgeR (Robinson et al., 2010) and inspected using by  
425 hexplot using R.

426

## 427 **Microfluidics-supported human embryoid formation**

428 Microfluidic devices for formation of embryoids from hPSCs under polarized exposure to BMP4  
429 were prepared as we previously described (Zheng et al., 2019). Human iPSCs were dissociated  
430 using Accutase (Innovative Cell Technologies, AT104) and suspended in mTeSR plus (Stemcell  
431 Technologies, 100-0276) medium containing 10 $\mu$ M Y27632 ROCK inhibitor (Axon Medchem,  
432 1683) at 1.0 x 10<sup>7</sup> cells/mL. The cell loading channel of the device was loaded with 1.0 x 10<sup>5</sup>  
433 cells in 10  $\mu$ L. To generate the posterior primitive streak-like cells, BMP4 (50 ng/mL) was added  
434 to the mTeSR Plus medium in the cell-loading channel whereas the gel channels was loaded with  
435 mTeSR Plus without BMP4.

436

## 437 **Immunofluorescence**

438 Cells were fixed by 4% formaldehyde in PBS for 12 h, and permeabilized in 0.1% Triton X-100  
439 in PBS for 1 h. After blocking in 4% donkey serum at 4°C for 3 h, cells were incubated with  
440 primary antibodies at 4 °C for 24 h and then secondary antibodies at room temperature for 6 h.  
441 Primary antibodies using in this study were goat anti-SOX17 (R&D Systems, AF1924, dilution  
442 1:2000), rabbit anti-NANOG (Cell Signaling Technology, 4903, dilution 1:200), mouse anti-  
443 TFAP2C (Santa Cruz, sc-12762, dilution 1:200). The secondary antibodies were donkey anti-  
444 rabbit-488 (Abcam, ab150061, dilution 1:500), donkey anti-goat-568 (Abcam, ab175704,  
445 dilution 1:500), and donkey anti-mouse-647 (Abcam, ab150111, dilution 1:500). Nuclei were  
446 counter-stained using Hoechst33342 (Thermo Fisher Scientific, H21492). Fluorescence images  
447 were taken with a Zeiss LSM710 confocal microscope and processed using Image J Fiji  
448 (Schindelin et al., 2012).

449

## 450 **RNA *in situ* hybridization**

451 RNA *in situ* hybridization was performed using the ViewRNA ISH Cell Assay Kit (Thermo  
452 Fisher, QVC0001) according to the manufacturer's instructions. Embryoids developed in the  
453 microfluidic device were fixed with 4% formaldehyde for 6 h and dehydrated with a graded  
454 series of methanol (50%, 75%, and 100%) and stored. Embryoids were rehydrated using a  
455 reverse series of methanol (75%, 50% in PBS), permeabilized in 0.1% Triton X-100 in PBS for 1  
456 h and digested with proteinase K for 10 min at room temperature. The embryoids were then  
457 hybridized with **a fluorescence-labeled DNA probe targeting human HML-2 endogenous**

458 **retrovirus RNA** for 3 h at 40°C, followed by incubation with the preamplifier, amplifier, and  
459 label probe solutions provided in the kit for 30 min each at 40°C. Nuclei of the embryoids were  
460 counter-stained with Hoechst 33342 and visualized by fluorescence microscopy as described  
461 earlier.

462

### 463 **Western blotting**

464 hiPSCs and LTC-hPGCLCs were grown in feeder-free conditions on Matrigel as we recently  
465 described (Kobayashi et al., 2022). Cell culture media were collected from subconfluent  
466 cultures **???** hours after final medium change and centrifuged at 300 x g for 5 min at 4 °C to  
467 remove cellular debris. Adherence cells were washed with ice-cold PBS and lysed in the RIPA  
468 buffer. Western blotting was performed as described (Kobayashi et al., 2022) using **an anti-GAG**  
469 **(mouse monoclonal anti-GAG, AUSTRAL Biologicals, HERM-1841-5, dilution 1:10,000)** and  
470 anti-β-actin (**company, cat#, dilution?**) primary antibodies and horseradish peroxidase-  
471 conjugated anti-mouse Ig secondary antibody (Santa Cruz, sc-516102).

472

### 473 **Quantitative proteomics**

474 hPGCLC cultures derived from male hiPSC clones A4 and 9A13 were produced and expanded *in*  
475 *vitro* for 138 86 days, respectively, as we described (Kobayashi et al., 2022). LTC-hPGCLCs and  
476 their parental hiPSCs were washed with cold PBS and centrifuged to obtain frozen cell pellets,  
477 each of which consisted of 2.5 million cells. Quantitative proteomics detection of HERV proteins  
478 was performed as we previously described (Ebright et al., 2020). Briefly, total proteins were  
479 extracted from frozen cell pellets, and their disulfide bonds were reduced followed by alkylation  
480 of free cysteine thiols. Proteins were digested by the Lys-C and trypsin endoproteinas, labeled  
481 with the TMT reagents, and subjected to analysis via reversed phase LC-M2/MS3 on an Orbitrap  
482 Fusion mass spectrometer. Proteins from which the digested peptides were derived were  
483 estimated against a proteomics database, including the HERV-K proteins GAG, POL, ENV,  
484 REC, and PRO.

485

### 486 **Immunoelectron microscopy**



487 Transmission and immunoelectron microscopy were performed as we described (Wilkie et al.,  
488 2022). Briefly, subconfluent human iPSCs (clone A4), LTC-hPGCLCs derived from them, and  
489 human NCCIT embryonal carcinoma cell lines were fixed with 4% paraformaldehyde and 0.1%  
490 glutaraldehyde in PBS and subjected to the standard transmission electron microscopy with  
491 negative staining using uranyl formate. For immunodetection of HERV-K VLPs, grids were  
492 stained with **an anti-HERVK capsid mouse monoclonal antibody (AUSTRAL Biologicals,**  
493 **HERM-1831-5, dilution 1:30)** followed by secondary staining with protein A conjugated with  
494 gold particles. The grids were examined on a JEOL 1200EX transmission electron microscope,  
495 and images were recorded with an AMT 2k CCD camera.

496

### 497 **Acknowledgements**

498 We are grateful to Dr. Akiko Iwasaki and Dr. Yong Kong at Yale University School of Medicine  
499 for fruitful discussions and bioinformatics assistance. We also thank the Massachusetts General  
500 Hospital FACS core facility for technical help in collecting hPGCLCs.

501

### 502 **Competing interests**

503 The authors declare no competing or financial interests.

504

### 505 **Author contributions**

506 Experiments: MuK, MiK, JoK, JJK, KS, HH, JO, AN, YZ, ME; Computational analysis: MuK,  
507 EZ; Writing: MuK, MaT, TS; Supervision: JF, MeT, KK, SS, DI, WH, CLW, TS; Conception:  
508 TS

509

### 510 **Funding**

511 This research was generously supported by the RICBAC Foundation and the Escher Fund for  
512 Autism gifts to TS. TS was also supported by NIH grants R01ES020454, R01ES023316,  
513 R01ES031139, and John Templeton Foundation Genetics Research Award #6228.

514

### 515 **Data availability**

516 All RNA-seq data described in this study are available from Gene Expression Omnibus  
517 (accession numbers GSE102943 and **GSE??????**).

## 519 **Figure Legends**

520

521 **Fig. 1. RNA-seq profiling of human iPSCs, embryoid bodies, PGCLCs, and**  
522 **seminoma tissues for expression of HERV RNA using ERVmap.** (A) Heatmap  
523 representations of unsupervised clustering of HERV RNA expression. Color-coded  
524 cell/tissue types are shown on top of each heatmap. Clusters of HERVs identified for  
525 the left heatmap are magnified in the right heatmap. (B) RNA expression of HERVs  
526 representing each cluster across eight cell/tissue types. Normalized RNA counts are  
527 shown in violin plots. Point, bar, and whiskers of the boxplot part in the violin shape  
528 indicate median, Q1 and Q3 quartiles, and minimum/maximum values. ERVmap IDs of  
529 HERVs and their clades (in parentheses) are shown for each panel.

530

531 **Fig. 2. Activation of the LTR5\_Hs human-specific HERVs in PGCLCs.** (A)  
532 Expression profiles of HERV RNA in human iPSCs and PGCLCs. Normalized RNA  
533 expression of HERVs was calculated from RNA-seq data of primed human iPSCs and  
534 hPGCLCs using ERVmap2 and presented for 18 HERV clades. Asterisk indicates  
535 statistical significance ( $p < 0.01$ ) between iPSC and PGCLC in each clade. *Inset:*  
536 Reverse transcription qPCR determination of RNA expression from HERVH and HML2  
537 in primed iPSCs, embryoid body (EB) cells at day 0 culture, CD38<sup>+</sup> PGCLCs at day 7  
538 culture, and CD38<sup>-</sup> EB cells at day 7 culture. Relative amounts of RNA to those in  
539 CD38<sup>-</sup> EB cells (defined as 1) are shown. Sharp indicates statistical significance ( $p <$   
540  $0.01$ ) to each of other cell types. Asterisk indicates significance ( $p < 0.01$ ). For both the  
541 main and inlet panels, each bar shows mean  $\pm$  SEM of data obtained from three  
542 independent human iPSC clones and PGCLCs generated from them. (B)  
543 Representative RNA-seq tracks of three independent human iPSC clones (A4, A5, A6)  
544 and PGCLCs derived from them for HERVH, HML2, and GAPDH. The bigWig tracks  
545 are normalized for each RNA for direct comparisons across all 6 RNA-seq data. (C)  
546 Differential expression of individual copies of HERVH and HML2 between human iPSCs  
547 and PGCLCs. Scatter plots shows statistically significant and insignificant differential  
548 expression as indicated. (D) Differential expression of HML2 species LTR5\_Hs, non-Hs  
549 LTR5, and LTR5 Half copies between human iPSCs and PGCLCs.

550

551 **Fig. 3. Expression of HERV RNA in human fetal germ cells.** (A, B) Single cell RNA-  
552 seq data of human fetal germ cells (Li, 2017) are presented as tSNE plots with color  
553 indexes for sex (A, *top*), gestational weeks (A, *bottom*), and marker genes (B). (C)  
554 Expression of 18-clades of HERV RNA in fetal germ cells at various developmental  
555 stages. Each subpanel shows relative expression of a HERV RNA species in female  
556 and male gonads at developmental stages color-coded as indicated. TPM, transcripts  
557 per kilobase million

558

559

560 **Fig. 4. Expression of HML2 RNA in human embryoids generated with a polarized**  
561 **exposure to BMP4 in a microfluidics device.** (A, B) Schematic representation of the  
562 microfluidics device for polarized exposure to human iPSC aggregates. (A) Formation of  
563 cell aggregates at the boundary of cell-loading and gel channels. (B) Morphological  
564 characteristics of the epiblast-like cyst (ELC), and the posteriorized embryonic-like sac  
565 (P-ELS) generated in the absence or presence of polarized exposure to BMP4. BM,  
566 basal medium. (C-E) Fluorescence confocal microscopy. (C) Immunofluorescence (IF)  
567 detection of NANOG, TFAP2C, and SOX17 proteins in ELC and P-ELS. (D) SOX17  
568 protein (IF) and HML2 RNA (RNA-ish) detection in P-ELS. (E) RNA-ish detection of  
569 NANOG and HML2 in P-ELS.

570

571 **Fig. 5. Expression of the HML2 proteins and virus-like particles (VLPs) in long-**  
572 **term culture human PGCLCs (LTC-hPGCLCs).** (A) Western blotting detection of  
573 HML2 GAG protein in cell lysate and cell culture supernatant. ACTB,  $\beta$ -actin. (B)  
574 Proteomics detection of HERVK GAG proteins (HERVK\_9 and HERVK\_21),  
575 pluripotency marker (SOX2), and PGCLC markers (SOX15 and CD38). Bars indicate  
576 mean  $\pm$  SD of triplicated measurements. (C) Locations of detected peptides in HML-2  
577 GAG, ENV, and PRO proteins. (D, E) Transmission electron microscopy images of  
578 VLPs formed at the surface of LTC-hPGCLCs. Areas shown with dotted rectangles in  
579 the low power images are magnified in the high-power image below. Scale bars in the  
580 low and high-power images indicate 500 nm and 100 nm, respectively. (E) Immunogold

581 staining using an anti-HERVK GAG protein demonstrates specific enrichment of the  
582 gold particles at the VLPs.

583 **References**

- 584 **Babaian, A. and Mager, D. L.** (2016). Endogenous retroviral promoter exaptation in human  
585 cancer. *Mob DNA* **7**, 24.
- 586 **Bendall, M. L., de Mulder, M., Iniguez, L. P., Lecanda-Sanchez, A., Perez-Losada, M.,**  
587 **Ostrowski, M. A., Jones, R. B., Mulder, L. C. F., Reyes-Teran, G., Crandall, K. A., et al.**  
588 (2019). Telescope: Characterization of the retrotranscriptome by accurate estimation of  
589 transposable element expression. *PLoS Comput Biol* **15**, e1006453.
- 590 **Bieda, K., Hoffmann, A. and Boller, K.** (2001). Phenotypic heterogeneity of human endogenous  
591 retrovirus particles produced by teratocarcinoma cell lines. *J Gen Virol* **82**, 591-596.
- 592 **Canadas, I., Thummalapalli, R., Kim, J. W., Kitajima, S., Jenkins, R. W., Christensen, C. L.,**  
593 **Campisi, M., Kuang, Y., Zhang, Y., Gjini, E., et al.** (2018). Tumor innate immunity primed  
594 by specific interferon-stimulated endogenous retroviruses. *Nat Med* **24**, 1143-1150.
- 595 **Chen, D., Liu, W., Lukianchikov, A., Hancock, G. V., Zimmerman, J., Lowe, M. G., Kim, R., Galic,**  
596 **Z., Irie, N., Surani, M. A., et al.** (2017). Germline competency of human embryonic stem  
597 cells depends on eomesodermin. *Biol Reprod* **97**, 850-861.
- 598 **Chuong, E. B., Elde, N. C. and Feschotte, C.** (2016). Regulatory evolution of innate immunity  
599 through co-option of endogenous retroviruses. *Science* **351**, 1083-1087.
- 600 **Curty, G., Marston, J. L., de Mulder Rougvie, M., Leal, F. E., Nixon, D. F. and Soares, M. A.**  
601 (2020). Human Endogenous Retrovirus K in Cancer: A Potential Biomarker and  
602 Immunotherapeutic Target. *Viruses* **12**.
- 603 **Deniz, O., de la Rica, L., Cheng, K. C. L., Spensberger, D. and Branco, M. R.** (2018). SETDB1  
604 prevents TET2-dependent activation of IAP retroelements in naive embryonic stem cells.  
605 *Genome Biol* **19**, 6.
- 606 **Doucet-O'Hare, T. T., Rosenblum, J. S., Shah, A. H., Gilbert, M. R. and Zhuang, Z.** (2021).  
607 Endogenous Retroviral Elements in Human Development and Central Nervous System  
608 Embryonal Tumors. *J Pers Med* **11**.
- 609 **Durnaoglu, S., Lee, S. K. and Ahnn, J.** (2021a). Human Endogenous Retroviruses as Gene  
610 Expression Regulators: Insights from Animal Models into Human Diseases. *Mol Cells* **44**,  
611 861-878.
- 612 ---- (2021b). Syncytin, envelope protein of human endogenous retrovirus (HERV): no longer  
613 'fossil' in human genome. *Anim Cells Syst (Seoul)* **25**, 358-368.
- 614 **Ebright, R. Y., Lee, S., Wittner, B. S., Niederhoffer, K. L., Nicholson, B. T., Bardia, A., Truesdell,**  
615 **S., Wiley, D. F., Wesley, B., Li, S., et al.** (2020). Deregulation of ribosomal protein  
616 expression and translation promotes breast cancer metastasis. *Science* **367**, 1468-1473.
- 617 **Evsikov, A. V. and Marin de Evsikova, C.** (2016). Friend or Foe: Epigenetic Regulation of  
618 Retrotransposons in Mammalian Oogenesis and Early Development. *Yale J Biol Med* **89**,  
619 487-497.
- 620 **Fuentes, D. R., Swigut, T. and Wysocka, J.** (2018). Systematic perturbation of retroviral LTRs  
621 reveals widespread long-range effects on human gene regulation. *Elife* **7**.
- 622 **Garcia-Montojo, M., Doucet-O'Hare, T., Henderson, L. and Nath, A.** (2018). Human  
623 endogenous retrovirus-K (HML-2): a comprehensive review. *Crit Rev Microbiol* **44**, 715-  
624 738.

- 625 **Geis, F. K. and Goff, S. P.** (2020). Silencing and Transcriptional Regulation of Endogenous  
626 Retroviruses: An Overview. *Viruses* **12**.
- 627 **Gell, J. J., Liu, W., Sosa, E., Chialastri, A., Hancock, G., Tao, Y., Wamaitha, S. E., Bower, G., Dey,**  
628 **S. S. and Clark, A. T.** (2020). An Extended Culture System that Supports Human  
629 Primordial Germ Cell-like Cell Survival and Initiation of DNA Methylation Erasure. *Stem*  
630 *Cell Reports* **14**, 433-446.
- 631 **Graham, L. and Orenstein, J. M.** (2007). Processing tissue and cells for transmission electron  
632 microscopy in diagnostic pathology and research. *Nat Protoc* **2**, 2439-2450.
- 633 **Grandi, N. and Tramontano, E.** (2018). Human Endogenous Retroviruses Are Ancient Acquired  
634 Elements Still Shaping Innate Immune Responses. *Front Immunol* **9**, 2039.
- 635 **Groh, S. and Schotta, G.** (2017). Silencing of endogenous retroviruses by heterochromatin. *Cell*  
636 *Mol Life Sci* **74**, 2055-2065.
- 637 **Grow, E. J., Flynn, R. A., Chavez, S. L., Bayless, N. L., Wossidlo, M., Wesche, D. J., Martin, L.,**  
638 **Ware, C. B., Blish, C. A., Chang, H. Y., et al.** (2015). Intrinsic retroviral reactivation in  
639 human preimplantation embryos and pluripotent cells. *Nature* **522**, 221-225.
- 640 **Holloway, J. R., Williams, Z. H., Freeman, M. M., Bulow, U. and Coffin, J. M.** (2019). Gorillas  
641 have been infected with the HERV-K (HML-2) endogenous retrovirus much more  
642 recently than humans and chimpanzees. *Proc Natl Acad Sci U S A* **116**, 1337-1346.
- 643 **Huang, W., Li, L., Myers, J. R. and Marth, G. T.** (2012). ART: a next-generation sequencing read  
644 simulator. *Bioinformatics* **28**, 593-594.
- 645 **Hwang, Y. S., Suzuki, S., Seita, Y., Ito, J., Sakata, Y., Aso, H., Sato, K., Hermann, B. P. and**  
646 **Sasaki, K.** (2020). Reconstitution of prospermatogonial specification in vitro from human  
647 induced pluripotent stem cells. *Nat Commun* **11**, 5656.
- 648 **Iniguez, L. P., de Mulder Rougvie, M., Stearrett, N., Jones, R. B., Ormsby, C. E., Reyes-Teran,**  
649 **G., Crandall, K. A., Nixon, D. F. and Bendall, M. L.** (2019). Transcriptomic analysis of  
650 human endogenous retroviruses in systemic lupus erythematosus. *Proc Natl Acad Sci U*  
651 *S A* **116**, 21350-21351.
- 652 **Irie, N., Weinberger, L., Tang, W. W., Kobayashi, T., Viukov, S., Manor, Y. S., Dietmann, S.,**  
653 **Hanna, J. H. and Surani, M. A.** (2015). SOX17 is a critical specifier of human primordial  
654 germ cell fate. *Cell* **160**, 253-268.
- 655 **Ito, J., Seita, Y., Kojima, S., Parrish, N. F., Sasaki, K. and Sato, K.** (2022). A hominoid-specific  
656 endogenous retrovirus may have rewired the gene regulatory network shared between  
657 primordial germ cells and naive pluripotent cells. *PLoS Genet* **18**, e1009846.
- 658 **Jeong, H. H., Yalamanchili, H. K., Guo, C., Shulman, J. M. and Liu, Z.** (2018). An ultra-fast and  
659 scalable quantification pipeline for transposable elements from next generation  
660 sequencing data. *Pac Symp Biocomput* **23**, 168-179.
- 661 **Kobayashi, M., Kobayashi, M., Odajima, J., Shioda, K., Hwang, Y. S., Sasaki, K., Chatterjee, P.,**  
662 **Kramme, C., Kohman, R. E., Church, G. M., et al.** (2022). Expanding homogeneous  
663 culture of human primordial germ cell-like cells maintaining germline features without  
664 serum or feeder layers. *Stem Cell Reports* **17**, 507-521.
- 665 **Lee, Y. N. and Bieniasz, P. D.** (2007). Reconstitution of an infectious human endogenous  
666 retrovirus. *PLoS Pathog* **3**, e10.

- 667 **Li, L., Dong, J., Yan, L., Yong, J., Liu, X., Hu, Y., Fan, X., Wu, X., Guo, H., Wang, X., et al.** (2017).  
668 Single-Cell RNA-Seq Analysis Maps Development of Human Germline Cells and Gonadal  
669 Niche Interactions. *Cell Stem Cell* **20**, 891-892.
- 670 **Liu, S., Brind'Amour, J., Karimi, M. M., Shirane, K., Bogutz, A., Lefebvre, L., Sasaki, H., Shinkai,**  
671 **Y. and Lorincz, M. C.** (2014). Setdb1 is required for germline development and silencing  
672 of H3K9me3-marked endogenous retroviruses in primordial germ cells. *Genes Dev* **28**,  
673 2041-2055.
- 674 **Mao, J., Zhang, Q. and Cong, Y. S.** (2021). Human endogenous retroviruses in development and  
675 disease. *Comput Struct Biotechnol J* **19**, 5978-5986.
- 676 **Mi, S., Lee, X., Li, X., Veldman, G. M., Finnerty, H., Racie, L., LaVallie, E., Tang, X. Y., Edouard,**  
677 **P., Howes, S., et al.** (2000). Syncytin is a captive retroviral envelope protein involved in  
678 human placental morphogenesis. *Nature* **403**, 785-789.
- 679 **Mitsunaga, S., Odajima, J., Yawata, S., Shioda, K., Owa, C., Isselbacher, K. J., Hanna, J. H. and**  
680 **Shioda, T.** (2017). Relevance of iPSC-derived human PGC-like cells at the surface of  
681 embryoid bodies to prechemotaxis migrating PGCs. *Proc Natl Acad Sci U S A* **114**, E9913-  
682 E9922.
- 683 **Mitsunaga, S., Shioda, K., Hanna, J. H., Isselbacher, K. J. and Shioda, T.** (2021). Production and  
684 Analysis of Human Primordial Germ Cell-Like Cells. *Methods Mol Biol* **2195**, 125-145.
- 685 **Muller, M. R., Skowron, M. A., Albers, P. and Nettersheim, D.** (2021). Molecular and  
686 epigenetic pathogenesis of germ cell tumors. *Asian J Urol* **8**, 144-154.
- 687 **Murase, Y., Yabuta, Y., Ohta, H., Yamashiro, C., Nakamura, T., Yamamoto, T. and Saitou, M.**  
688 (2020). Long-term expansion with germline potential of human primordial germ cell-like  
689 cells in vitro. *EMBO J* **39**, e104929.
- 690 **Ohnuki, M., Tanabe, K., Sutou, K., Teramoto, I., Sawamura, Y., Narita, M., Nakamura, M.,**  
691 **Tokunaga, Y., Nakamura, M., Watanabe, A., et al.** (2014). Dynamic regulation of human  
692 endogenous retroviruses mediates factor-induced reprogramming and differentiation  
693 potential. *Proc Natl Acad Sci U S A* **111**, 12426-12431.
- 694 **Oosterhuis, J. W. and Looijenga, L. H. J.** (2019). Human germ cell tumours from a  
695 developmental perspective. *Nat Rev Cancer* **19**, 522-537.
- 696 **Pontis, J., Planet, E., Offner, S., Turelli, P., Duc, J., Coudray, A., Theunissen, T. W., Jaenisch, R.**  
697 **and Trono, D.** (2019). Hominoid-Specific Transposable Elements and KZFPs Facilitate  
698 Human Embryonic Genome Activation and Control Transcription in Naive Human ESCs.  
699 *Cell Stem Cell* **24**, 724-735 e725.
- 700 **Quinlan, A. R. and Hall, I. M.** (2010). BEDTools: a flexible suite of utilities for comparing  
701 genomic features. *Bioinformatics* **26**, 841-842.
- 702 **Robinson, M. D., McCarthy, D. J. and Smyth, G. K.** (2010). edgeR: a Bioconductor package for  
703 differential expression analysis of digital gene expression data. *Bioinformatics* **26**, 139-  
704 140.
- 705 **Saitou, M.** (2021). Mammalian Germ Cell Development: From Mechanism to In Vitro  
706 Reconstitution. *Stem Cell Reports* **16**, 669-680.
- 707 **Sakurai, K., Shioda, K., Eguchi, A., Watanabe, M., Miyaso, H., Mori, C. and Shioda, T.** (2019).  
708 DNA methylome of human neonatal umbilical cord: Enrichment of differentially  
709 methylated regions compared to umbilical cord blood DNA at transcription factor genes

- 710 involved in body patterning and effects of maternal folate deficiency or children's sex.  
711 *PLoS One* **14**, e0214307.
- 712 **Sasaki, K., Yokobayashi, S., Nakamura, T., Okamoto, I., Yabuta, Y., Kurimoto, K., Ohta, H.,**  
713 **Moritoki, Y., Iwatani, C., Tsuchiya, H., et al.** (2015). Robust In Vitro Induction of Human  
714 Germ Cell Fate from Pluripotent Stem Cells. *Cell Stem Cell* **17**, 178-194.
- 715 **Schindelin, J., Arganda-Carreras, I., Frise, E., Kaynig, V., Longair, M., Pietzsch, T., Preibisch, S.,**  
716 **Rueden, C., Saalfeld, S., Schmid, B., et al.** (2012). Fiji: an open-source platform for  
717 biological-image analysis. *Nat Methods* **9**, 676-682.
- 718 **Sexton, C. E., Tillett, R. L. and Han, M. V.** (2022). The essential but enigmatic regulatory role of  
719 HERVH in pluripotency. *Trends Genet* **38**, 12-21.
- 720 **Sharif, J., Shinkai, Y. and Koseki, H.** (2013). Is there a role for endogenous retroviruses to  
721 mediate long-term adaptive phenotypic response upon environmental inputs? *Philos*  
722 *Trans R Soc Lond B Biol Sci* **368**, 20110340.
- 723 **Shioda, K., Odajima, J., Blumberg, B. and Shioda, T.** (2022). Transgenerational Transcriptomic  
724 and DNA Methylome Profiling of Mouse Fetal Testicular Germline and Somatic Cells  
725 after Exposure of Pregnant Mothers to Tributyltin, a Potent Obesogen. *Metabolites* **12**.
- 726 **Subramanian, R. P., Wildschutte, J. H., Russo, C. and Coffin, J. M.** (2011). Identification,  
727 characterization, and comparative genomic distribution of the HERV-K (HML-2) group of  
728 human endogenous retroviruses. *Retrovirology* **8**, 90.
- 729 **Tarailo-Graovac, M. and Chen, N.** (2009). Using RepeatMasker to identify repetitive elements  
730 in genomic sequences. *Curr Protoc Bioinformatics* **Chapter 4**, Unit 4 10.
- 731 **Tarasov, A., Vilella, A. J., Cuppen, E., Nijman, I. J. and Prins, P.** (2015). Sambamba: fast  
732 processing of NGS alignment formats. *Bioinformatics* **31**, 2032-2034.
- 733 **Ting, C. N., Rosenberg, M. P., Snow, C. M., Samuelson, L. C. and Meisler, M. H.** (1992).  
734 Endogenous retroviral sequences are required for tissue-specific expression of a human  
735 salivary amylase gene. *Genes Dev* **6**, 1457-1465.
- 736 **Tokuyama, M., Kong, Y. and Iwasaki, A.** (2019). Reply to Iniguez et al.: ERVmap is a validated  
737 approach to mapping proviral endogenous retroviruses in the human genome. *Proc Natl*  
738 *Acad Sci U S A* **116**, 21352-21353.
- 739 **Tokuyama, M., Kong, Y., Song, E., Jayewickreme, T., Kang, I. and Iwasaki, A.** (2018). ERVmap  
740 analysis reveals genome-wide transcription of human endogenous retroviruses. *Proc*  
741 *Natl Acad Sci U S A* **115**, 12565-12572.
- 742 **von Meyenn, F., Berrens, R. V., Andrews, S., Santos, F., Collier, A. J., Krueger, F., Osorno, R.,**  
743 **Dean, W., Rugg-Gunn, P. J. and Reik, W.** (2016). Comparative Principles of DNA  
744 Methylation Reprogramming during Human and Mouse In Vitro Primordial Germ Cell  
745 Specification. *Dev Cell* **39**, 104-115.
- 746 **Weiss, R. A.** (2016). Human endogenous retroviruses: friend or foe? *APMIS* **124**, 4-10.
- 747 **Wilkie, A. R., Sharma, M., Coughlin, M., Pesola, J. M., Ericsson, M., Lawler, J. L., Fernandez, R.**  
748 **and Coen, D. M.** (2022). Human Cytomegalovirus Nuclear Egress Complex Subunit,  
749 UL53, Associates with Capsids and Myosin Va, but Is Not Important for Capsid  
750 Localization towards the Nuclear Periphery. *Viruses* **14**.
- 751 **Xiang, X., Tao, Y., DiRusso, J., Hsu, F. M., Zhang, J., Xue, Z., Pontis, J., Trono, D., Liu, W. and**  
752 **Clark, A. T.** (2022). Human reproduction is regulated by retrotransposons derived from  
753 ancient Hominidae-specific viral infections. *Nat Commun* **13**, 463.



- 754 **Xue, B., Sechi, L. A. and Kelvin, D. J.** (2020a). Human Endogenous Retrovirus K (HML-2) in  
755 Health and Disease. *Front Microbiol* **11**, 1690.
- 756 **Xue, B., Zeng, T., Jia, L., Yang, D., Lin, S. L., Sechi, L. A. and Kelvin, D. J.** (2020b). Identification  
757 of the distribution of human endogenous retroviruses K (HML-2) by PCR-based target  
758 enrichment sequencing. *Retrovirology* **17**, 10.
- 759 **Yamashiro, C., Sasaki, K., Yabuta, Y., Kojima, Y., Nakamura, T., Okamoto, I., Yokobayashi, S.,**  
760 **Murase, Y., Ishikura, Y., Shirane, K., et al.** (2018). Generation of human oogonia from  
761 induced pluripotent stem cells in vitro. *Science* **362**, 356-360.
- 762 **Zhang, T., Zheng, R., Li, M., Yan, C., Lan, X., Tong, B., Lu, P. and Jiang, W.** (2022). Active  
763 endogenous retroviral elements in human pluripotent stem cells play a role in regulating  
764 host gene expression. *Nucleic Acids Res* **50**, 4959-4973.
- 765 **Zhang, Y., Li, T., Preissl, S., Amaral, M. L., Grinstein, J. D., Farah, E. N., Destici, E., Qiu, Y., Hu,**  
766 **R., Lee, A. Y., et al.** (2019). Transcriptionally active HERV-H retrotransposons demarcate  
767 topologically associating domains in human pluripotent stem cells. *Nat Genet* **51**, 1380-  
768 1388.
- 769 **Zhao, S., Zhu, W., Xue, S. and Han, D.** (2014). Testicular defense systems: immune privilege and  
770 innate immunity. *Cell Mol Immunol* **11**, 428-437.
- 771 **Zheng, Y., Xue, X., Shao, Y., Wang, S., Esfahani, S. N., Li, Z., Muncie, J. M., Lakins, J. N.,**  
772 **Weaver, V. M., Gumucio, D. L., et al.** (2019). Controlled modelling of human epiblast  
773 and amnion development using stem cells. *Nature* **573**, 421-425.
- 774

Fig. 1

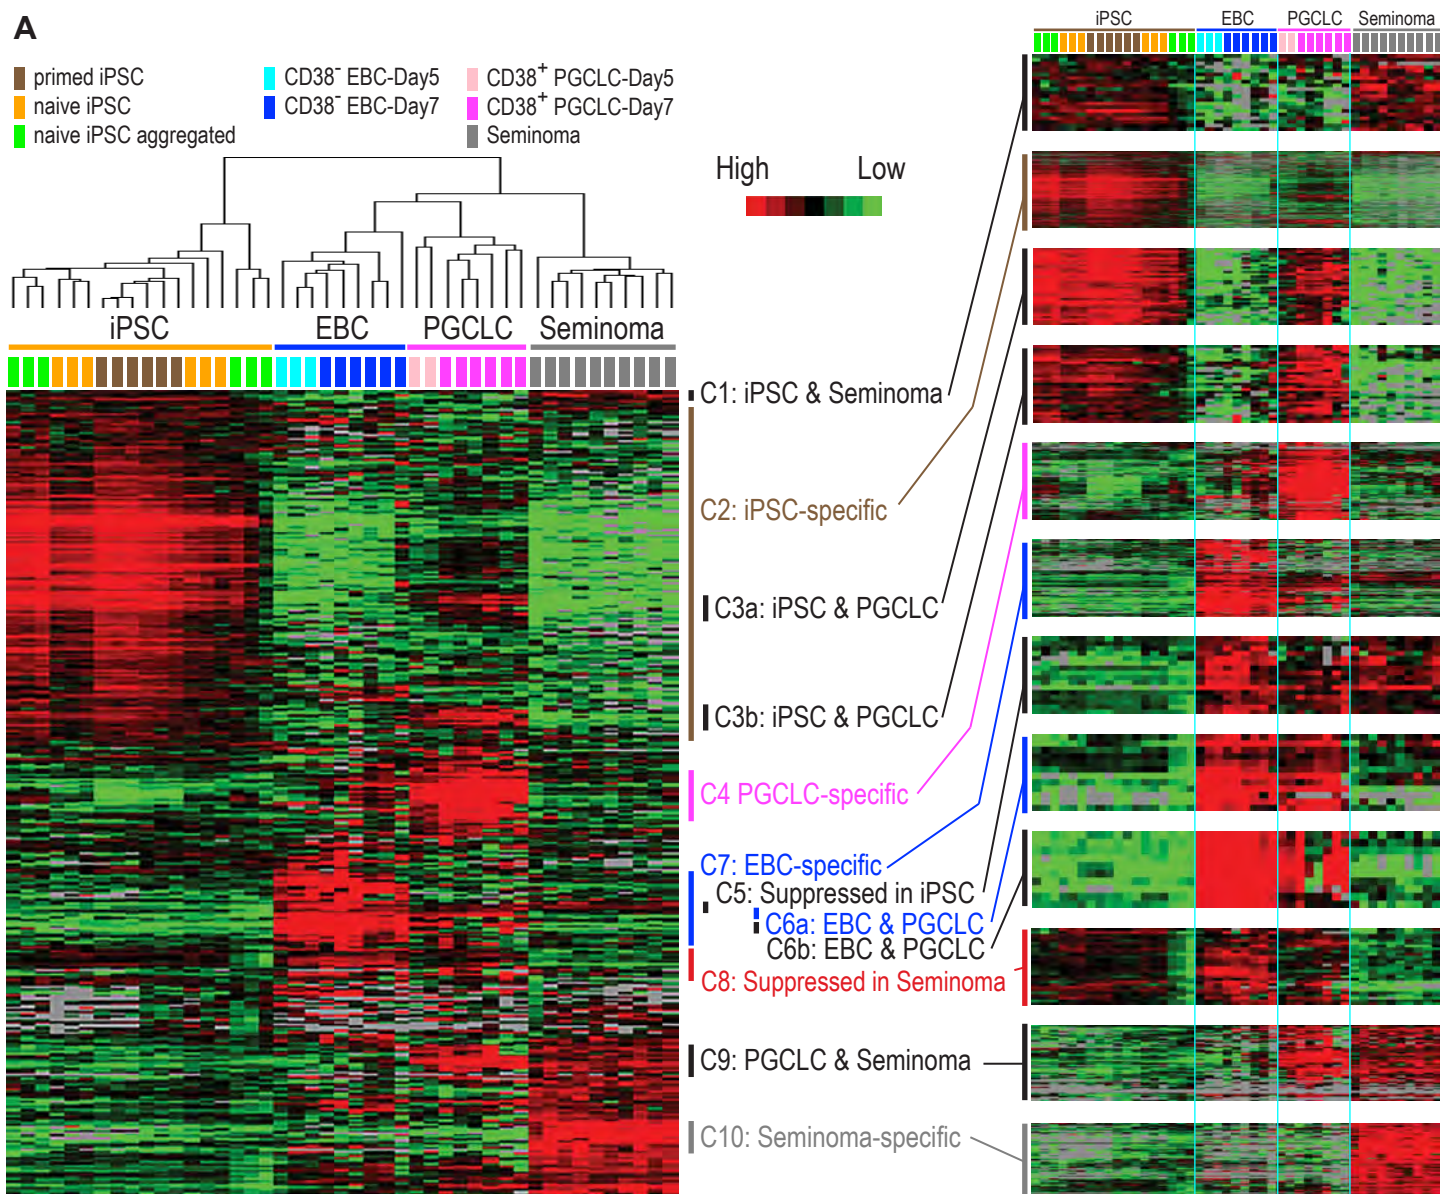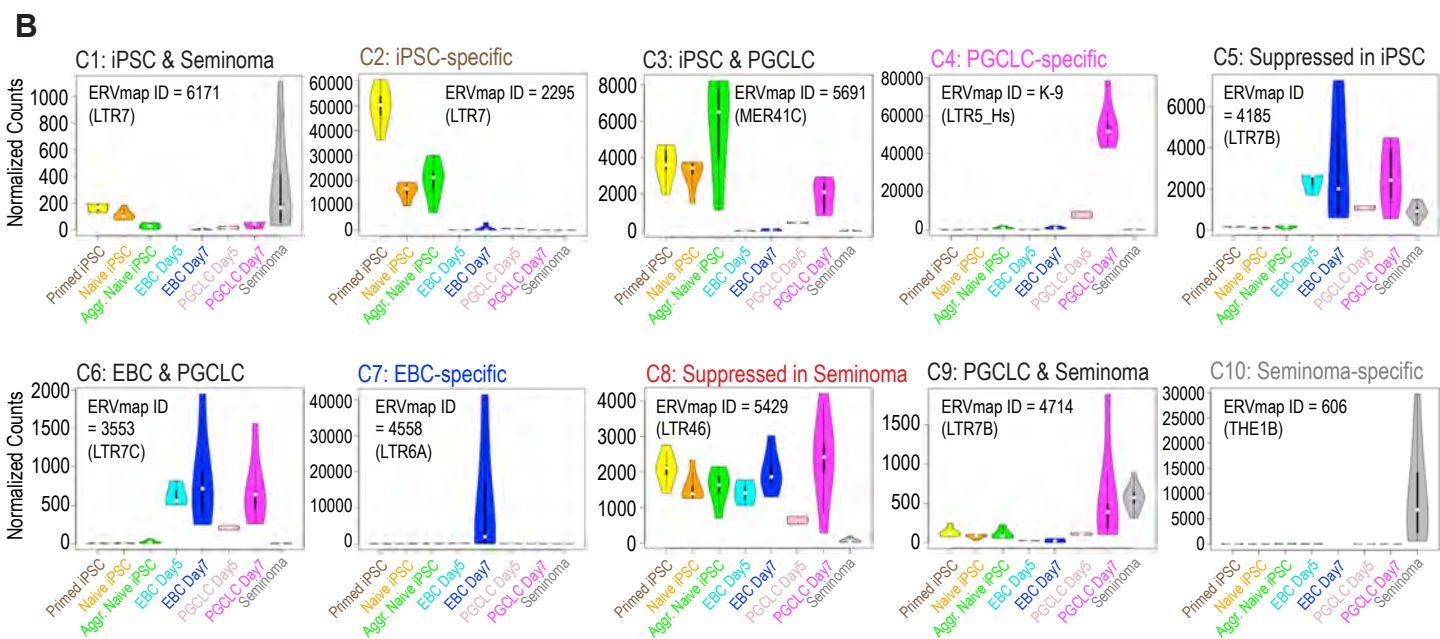

Fig. 2

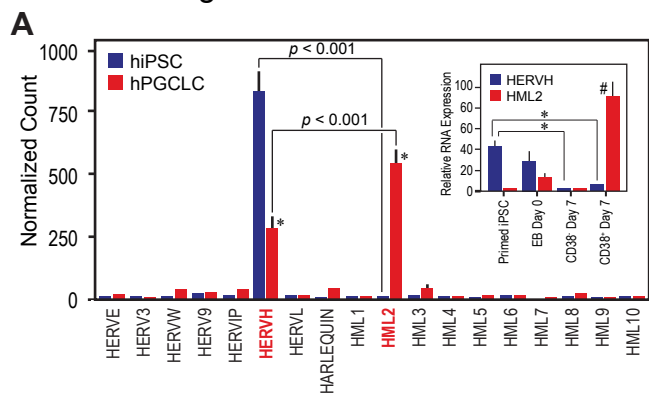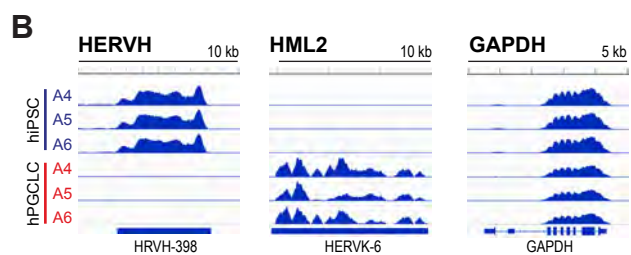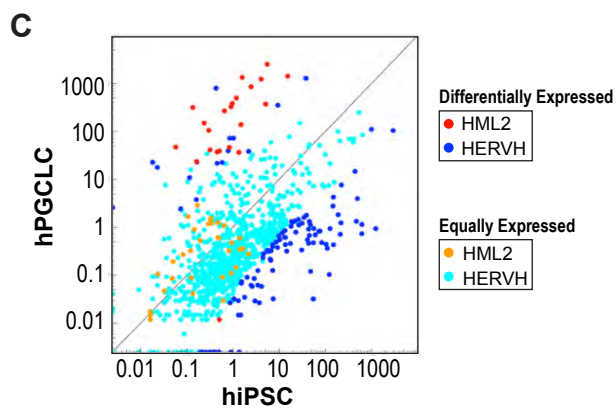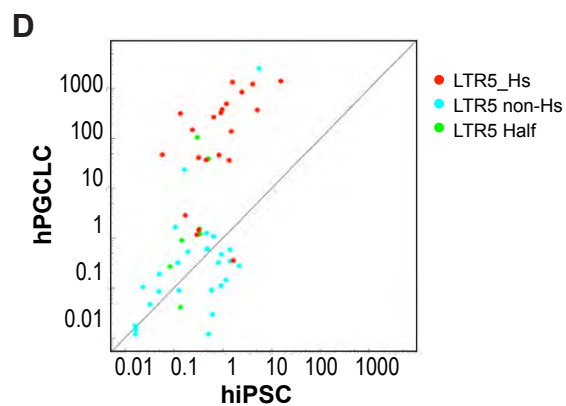

Fig. 3

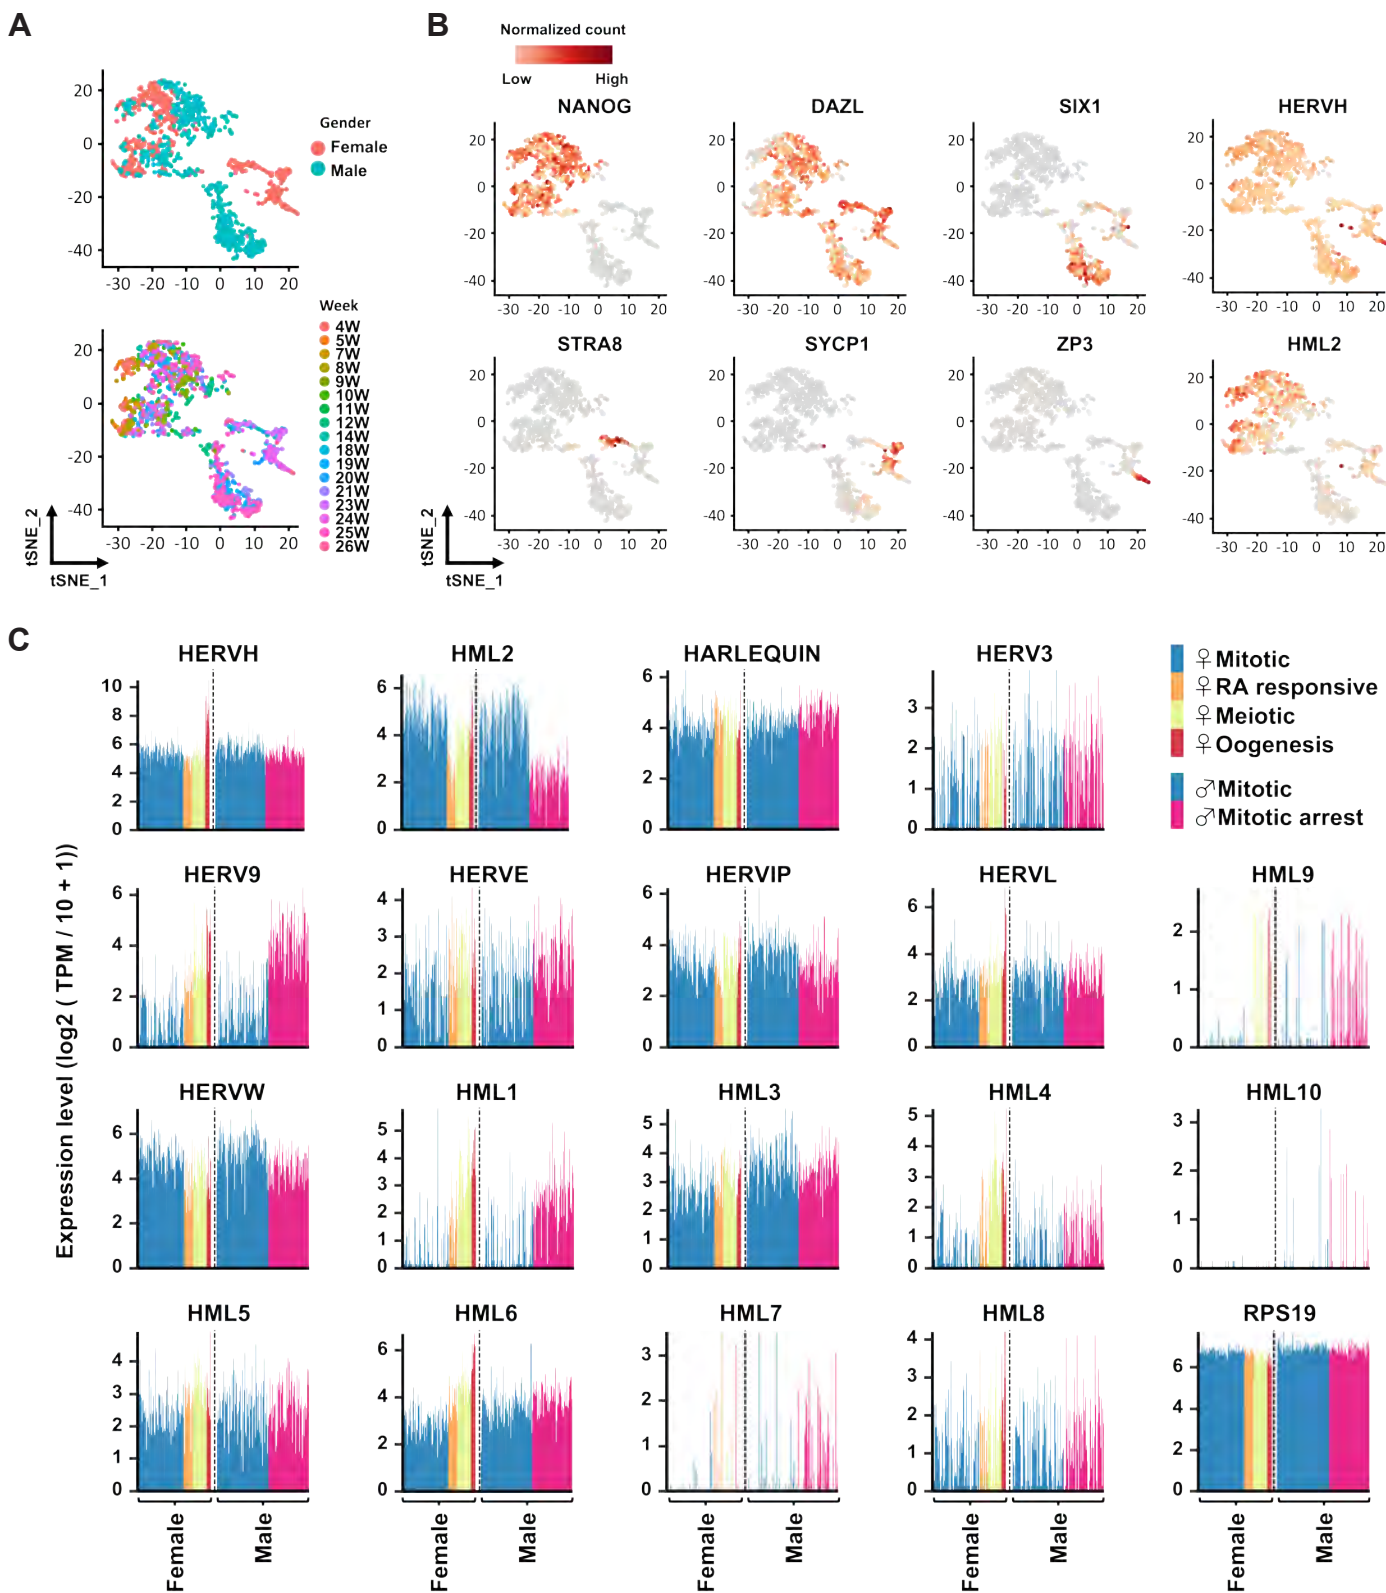

Fig. 4

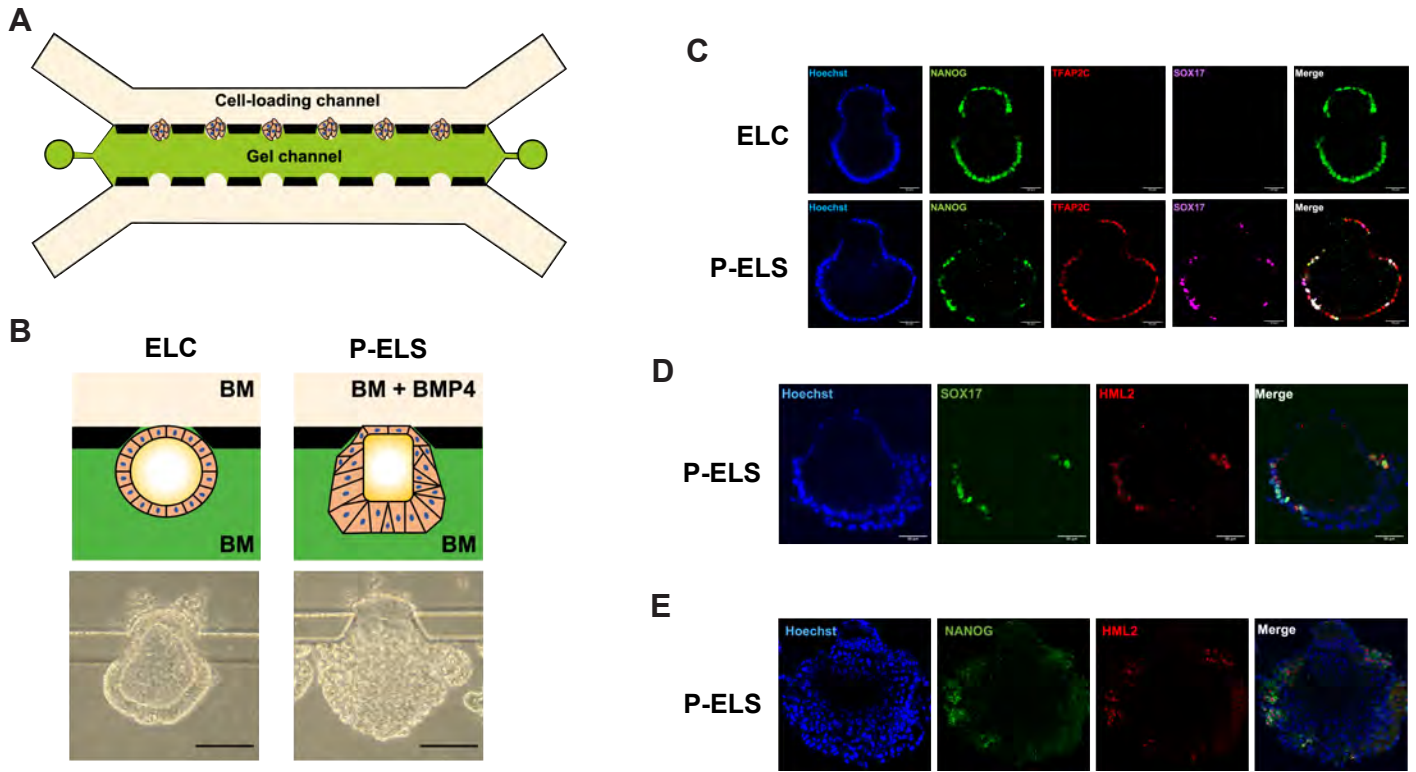

Fig. 5

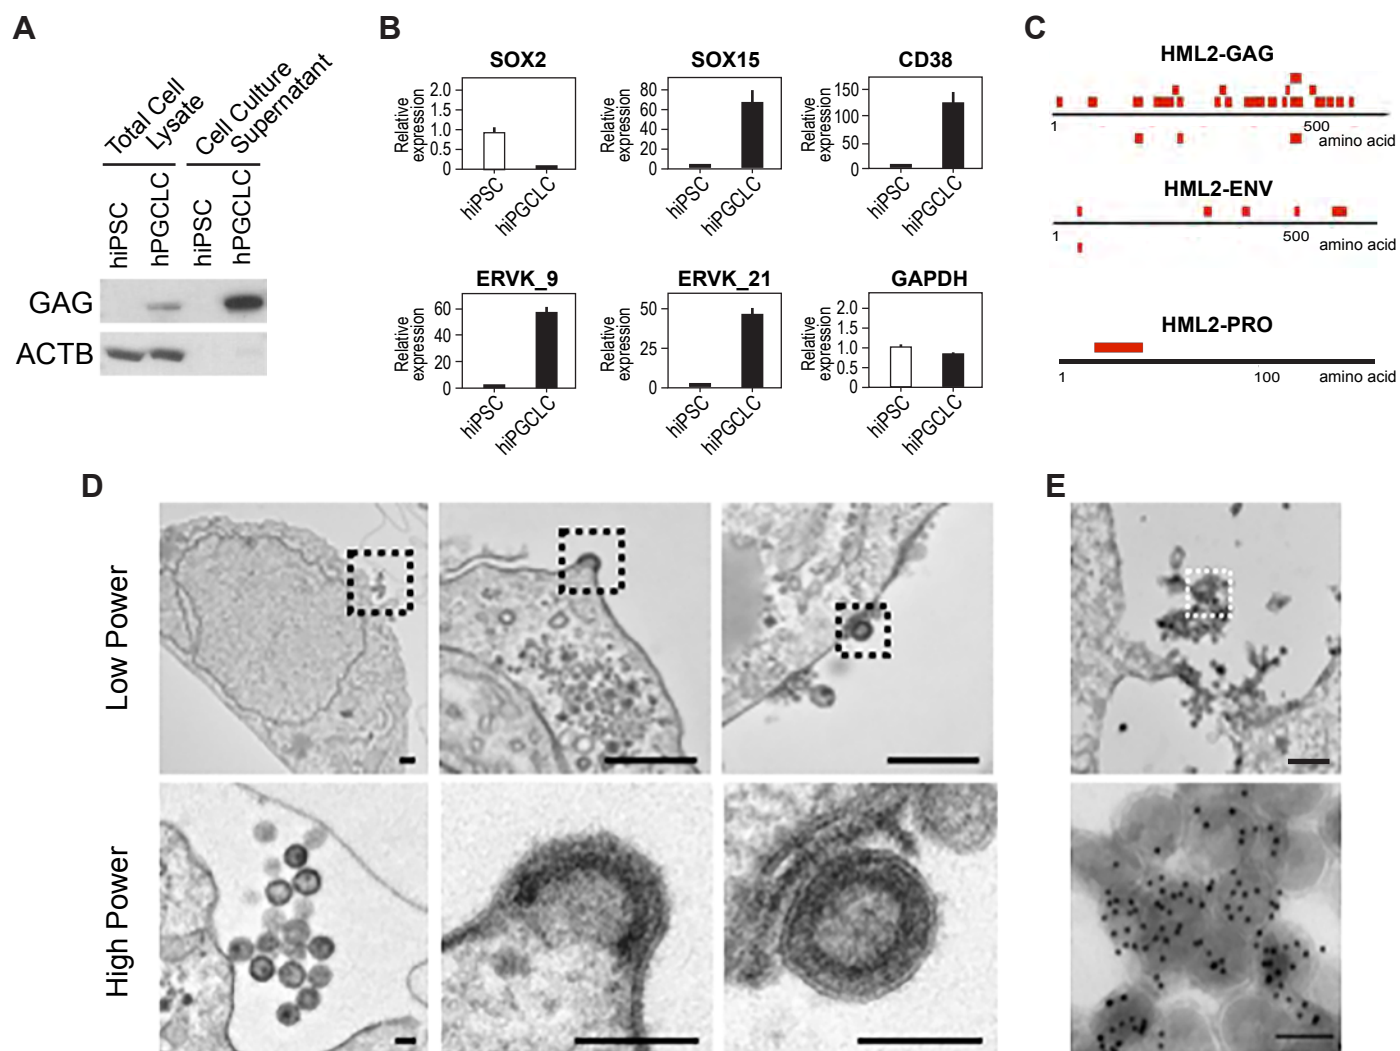

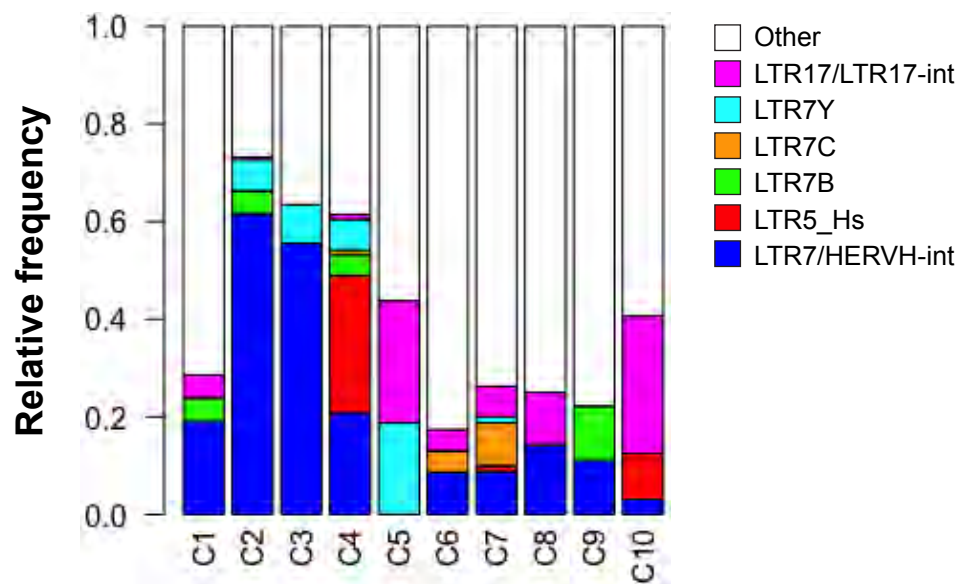

**Fig. S1: Distribution of HERV species in cell/tissue type-specific HERV clusters.**

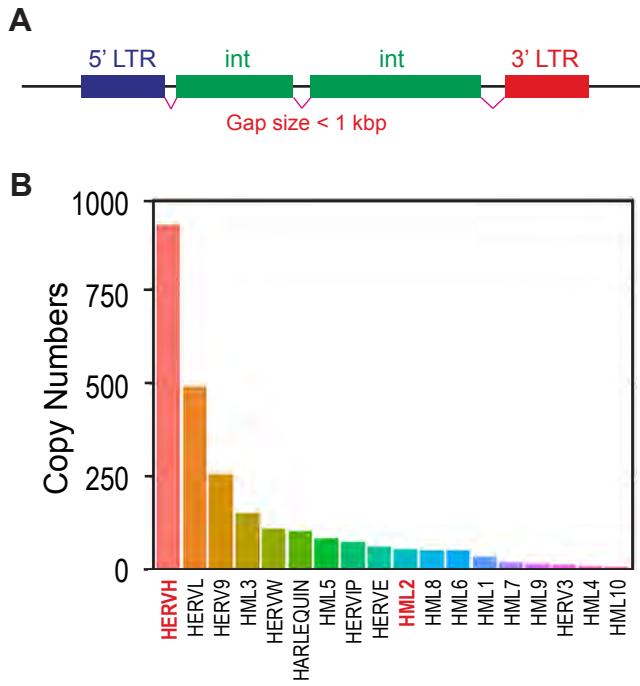

**Fig. S2: Copy numbers of well-organized HERV proviruses in the human genome.** (A) Definition of a well-organized HERV provirus. (B) Copy numbers of the well-organized HERV proviruses belonging to the 18 HERV clades detected in the GRCh38/hg38 human reference genome sequence.



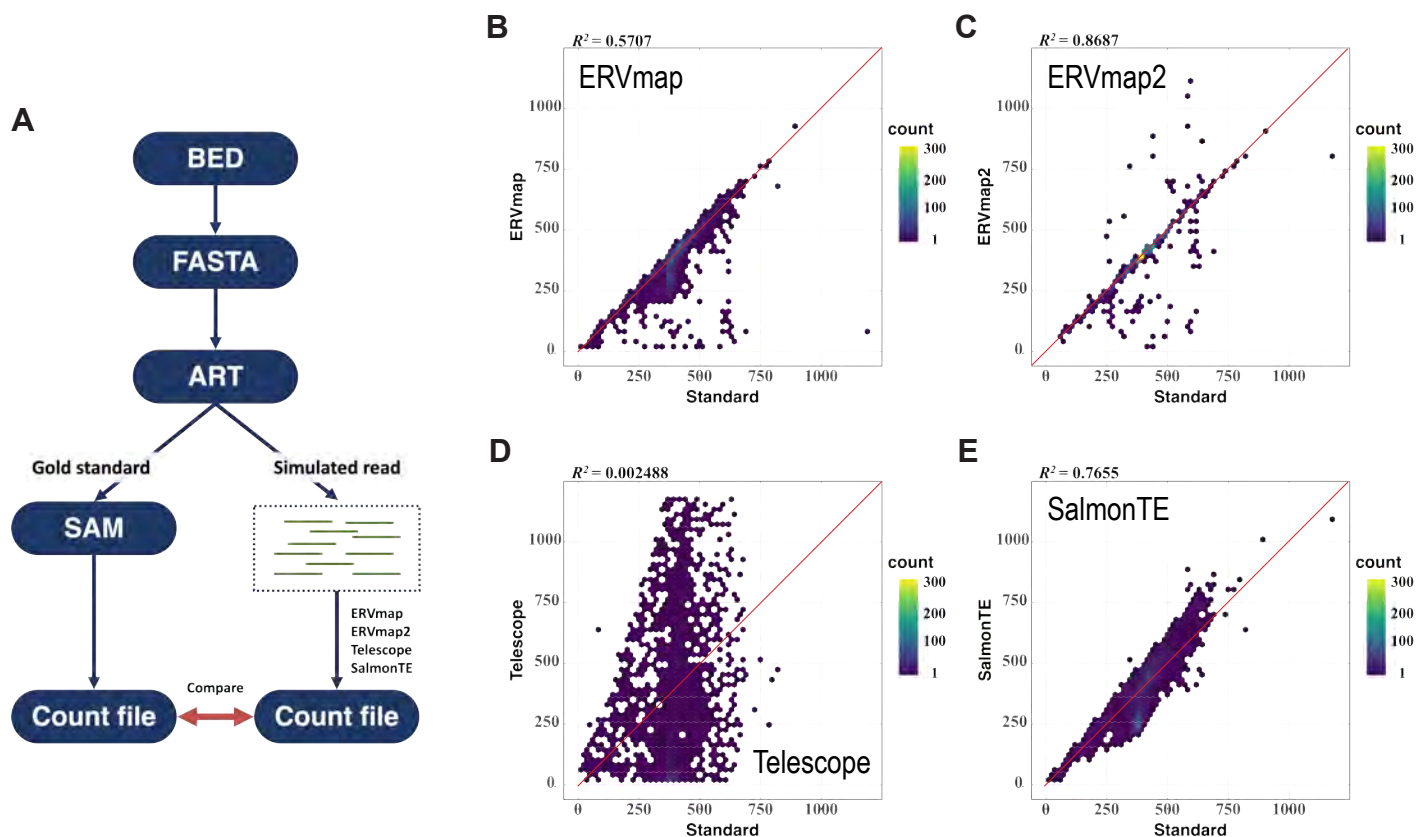

**Fig. S3. Evaluation of computational tools for determination of RNA expression from the well-organized copies of HERV proviruses.** (A) Analytical scheme. FASTA format sequences of the well-organized copies of HERV proviruses were generated using coordinates of Table S2. Simulated reads resembling Illumina sequencing data (FASTQ format) and the “gold standard” read read alignment data (SAM format) were generated using the ART simulator tool. The simulated FASTQ data were subjected to HERV RNA expression analysis using (B) original ERVmap, (C), ERVmap2, (D), Telescope, and (E) SalmonTE. Panels (B-E) are hexbin plots comparing the gold standard counts (X axis) and the counts reported by each tool (Y axis). Thus, when outcomes of a tool agrees with the gold standard, datum points align along the  $Y=X$  line (red) whereas over- and under- estimated HERV counts are reflected by datum points above or below the  $Y=X$  line, respectively.

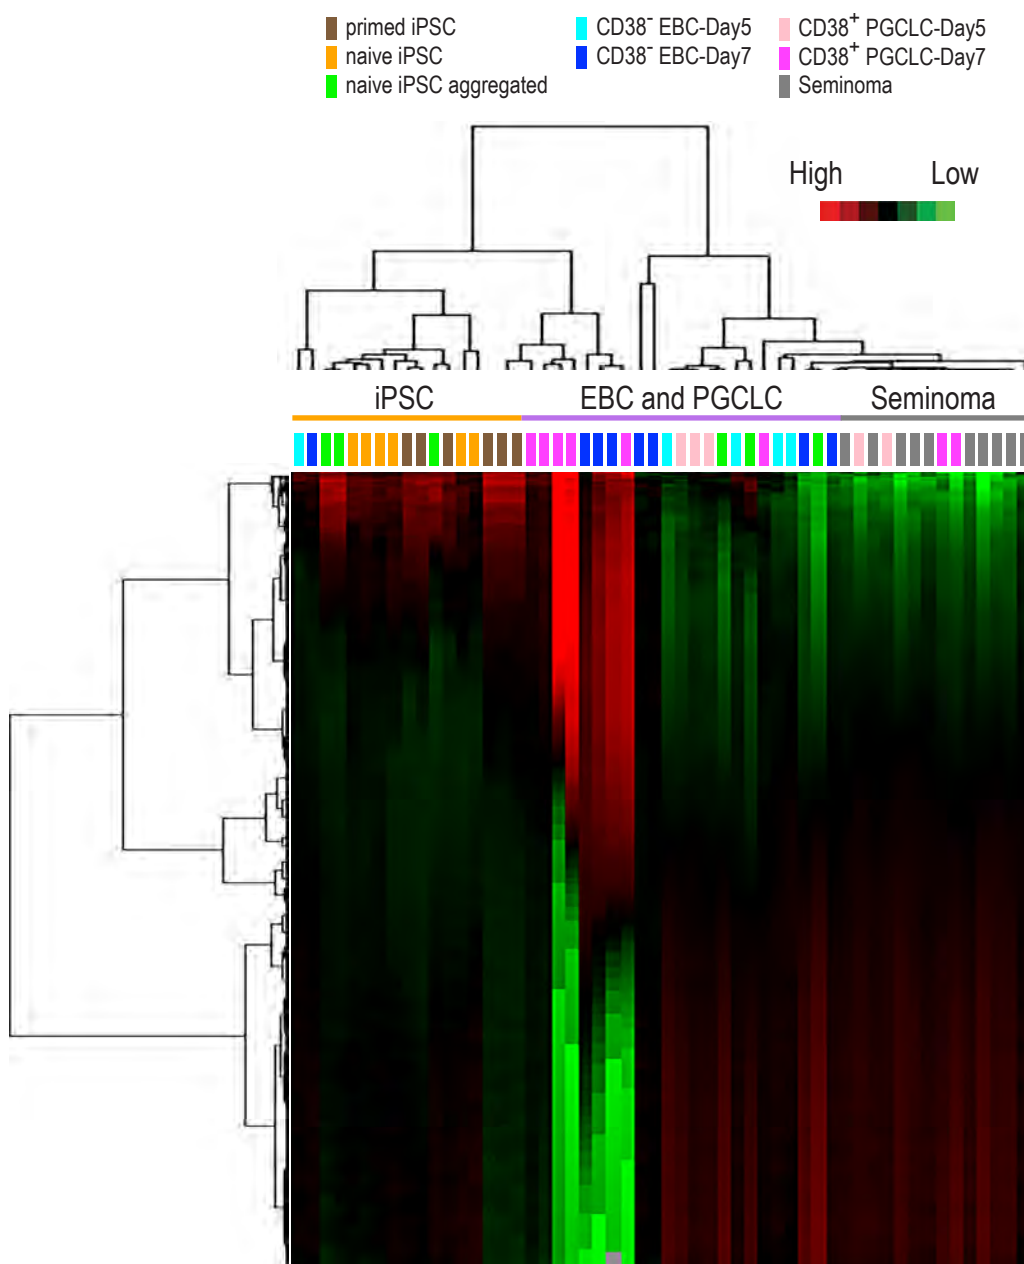

**Fig. S4. RNA-seq profiling of human iPSCs, embryoid bodies, PGCLCs, and seminoma tissues for expression of HERV RNA using Telescope.** Heatmap representations of unsupervised clustering of HERV RNA expression. Color-coded cell/tissue types are shown on top of the heatmap.

**Table S3. Copy numbers of well-organized HERVs in the 18 HERV clades in GRCh38/hg38.**

| <b>HERV clade</b> | <b>LTR</b>                                                           | <b>Internal (int) sequence</b>                    | <b>Copy Numbers</b> |
|-------------------|----------------------------------------------------------------------|---------------------------------------------------|---------------------|
| HERVE             | LTR2, LTR2A, LTR2B, LTR2C                                            | HERVE_a-int<br>HERVE-int                          | 61                  |
| HERV3             | LTR4                                                                 | HERV3-int                                         | 12                  |
| HERVW             | LTR17                                                                | HERV17-int                                        | 109                 |
| HERV9             | LTR12, LTR12_, LTR12B, LTR12C,<br>LTR12D, LTR12E, LTR12F             | HERV9-int<br>HERV9N-int<br>HERV9NC-int            | 255                 |
| HERVIP            | LTR10B, LTR10B1, LTR10B2, LTR10F                                     | HERVIP10B3-int<br>HERVIP10F-int<br>HERVIP10FH-int | 74                  |
| <b>HERVH</b>      | LTR7, LTR7A, LTR7B, LTR7Y                                            | HERVH-int                                         | 923                 |
| HERVL             | MLT2A1, MLT2A2, MLT2B3                                               | HERVL-int                                         | 489                 |
| HARLEQUIN         | LTR2, LTR2A, LTR2B, LTR2C                                            | Harlequin-int                                     | 102                 |
| HML1              | LTR14, LTR14A, LTR14B                                                | HERVK14-int                                       | 32                  |
| <b>HML2</b>       | LTR5, <b>LTR5_Hs</b> , LTR5A, LTR5B                                  | HERVK-int                                         | 55                  |
| HML3              | MER9a1, MER9a2, MER9a3                                               | HERVK9-int                                        | 153                 |
| HML4              | LTR13, LTR13_, LTR13A                                                | HERVK13-int                                       | 11                  |
| HML5              | LTR22, LTR22A, LTR22B, LTR22B1,<br>LTR22B2, LTR22C0, LTR22C2, LTR22E | HERVK22-int                                       | 83                  |
| HML6              | LTR3, LTR3A, LTR3B, LTR3B_                                           | HERVK3-int                                        | 52                  |
| HML7              | MER11D                                                               | HERVK11-int                                       | 20                  |
| HML8              | MER11A, MER11B, MER11C                                               | HERVK11-int                                       | 53                  |
| HML9              | LTR14C                                                               | HERVK14C-int                                      | 15                  |
| HML10             | MLT14                                                                | HERVKC4-int                                       | 5                   |
